1

2 **A novel zebrafish intestinal tumor model reveals a role for *cyp7a1*-**  
3 **dependent tumor-liver crosstalk in tumor's adverse effects on host**

4

5 Sora Enya<sup>1,2</sup>, Koichi Kawakami<sup>3</sup>, Yutaka Suzuki<sup>4</sup>, Shinpei Kawaoka<sup>1,2¶</sup>

6

7 Advanced Telecommunications Research Institute International (ATR), The Thomas N. Sato  
8 BioMEC-X Laboratories, Kyoto, Japan<sup>1</sup>; ERATO Sato Live Bio-forecasting Project, Japan  
9 Science and Technology Agency (JST), Kyoto, Japan<sup>2</sup>; Division of Molecular and  
10 Developmental Biology, National Institute of Genetics, and Department of Genetics,  
11 SOKENDAI (The Graduate University for Advanced Studies), Mishima, Shizuoka, Japan<sup>3</sup>;  
12 The University of Tokyo, graduate school of frontier science, Kashiwa, Japan<sup>4</sup>

13

14 ¶Corresponding Author:

15 Shinpei Kawaoka, Ph.D

16 The Thomas N. Sato BioMEC-X Laboratories

17 Advanced Telecommunications Research Institute International (ATR)

18 2-2-2 Hikaridai, Seika-cho, Soraku-gun, Kyoto 619-0288

19 TEL: +81-774-95-2313

20 FAX: +81-774-95-0288

21 Email: [kawaokashinpei@gmail.com](mailto:kawaokashinpei@gmail.com)

22

23 Short title; Genetically dissecting tumor's adverse effects on host in zebrafish

24

25 **Abstract**

26 The nature of host organs and genes that underlie tumor-induced physiological disruption on  
27 host remains ill-defined. Here, we establish a novel zebrafish intestinal tumor model that is  
28 optimized for addressing this issue, and find that hepatic *cyp7a1*, the rate-limiting factor for  
29 synthesizing bile acids (BAs), is such a host gene. Inducing *kras<sup>G12D</sup>* by *Gal4* specifically  
30 expressed in the posterior intestine resulted in formation of an intestinal tumor classified as  
31 dysplasia. The local intestinal tumor caused systemic detrimental effects on host including  
32 liver inflammation, hepatomegaly, growth defects, and organismal death. Whole-organismal  
33 level gene expression analysis and metabolite measurements revealed that the intestinal tumor  
34 reduced total BAs levels via down-regulation of hepatic *cyp7a1*. Genetically rescuing *cyp7a1*  
35 expression in the liver restored the BAs synthesis and ameliorated tumor-induced liver  
36 inflammation, but not other tumor-dependent phenotypes. Thus, we found a previously  
37 unknown role of *cyp7a1* as the host gene that links the intestinal tumor, hepatic cholesterol-  
38 BAs metabolism, and liver inflammation in tumor-bearing fish. Our model provides an  
39 important basis to discover host genes responsible for tumor-induced phenotypes and to  
40 uncover mechanisms underlying how tumors adversely affect host organisms.

41

42 **Introduction**

43 Tumors disrupt host physiology in various ways, ultimately leading to organismal death  
44 (Egeblad et al., 2010; Fearon et al., 2012; McAllister and Weinberg, 2014; Owusu-Ansah and  
45 Perrimon, 2015). Mechanisms underlying physiological disruption by tumors involve inter-  
46 organ communication between tumors and normal organs. Due to its complex nature, how  
47 tumors affect host organs—and when and how host organs detect and respond to tumors—  
48 have remained largely elusive. In particular, host genes and signaling cascades mediating  
49 tumor-organ interaction (and thus tumor-induced phenotypes) are poorly defined.  
50 Understanding the nature of tumor-organ interaction and its mediator(s) at the genetic level is  
51 essential to understand how tumors interfere with host physiology, and to suggest a therapy  
52 that buffers tumor-dependent physiological disruption on host.

53           Animal models that are amenable to whole-organismal level experiments and  
54 genetic manipulations provide a tool for discovering physiologically important tumor-organ  
55 interaction and underlying mechanisms behind them. The fly *Drosophila melanogaster* is one  
56 such model. A fly tumor originating from the eye imaginal disc secretes insulin-like peptide 8  
57 (Dilp8) to delay organismal growth and maturation, thereby enabling, or forcing, the  
58 organism to coordinate their overall growth with a local disease state (Garelli et al., 2012).  
59 Consistent with local disrupted states having influence on distant processes such as growth,  
60 physiological disruption such as wounding also induces a Dilp8-dependent growth delay  
61 (Colombani et al., 2015; Colombani et al., 2012; Garelli et al., 2012; Garelli et al., 2015;  
62 Katsuyama et al., 2015; Owusu-Ansah and Perrimon, 2015; Vallejo et al., 2015). In this  
63 phenomenon, Lgr3, the receptor for Dilp8 expressed in neurons, is the host protein  
64 responsible for the tumor-dependent growth delay (Colombani et al., 2015; Garelli et al.,  
65 2015; Vallejo et al., 2015). These studies establish the concept that organisms are able to  
66 sense local physiological disruption that can be spread systemically (Owusu-Ansah and  
67 Perrimon, 2015). Others have shown that fly tumors produce ImpL2, an antagonist for  
68 insulin-like growth factors, to cause loss of peripheral tissues including muscle and fat, a  
69 phenomenon called cachexia (Fearon et al., 2012; Figueroa-Clarevega and Bilder, 2015;

70 Kwon et al., 2015). Such hormone-mediated mechanisms of cancer-induced cachexia have  
71 also been reported also in mice. For example, lung cancer secretes parathyroid-related  
72 hormone (PTHrP) that increases fat thermogenesis through its receptor PTHR, a host gene  
73 expressed in fat cells, resulting in cachexia (Kir et al., 2016; Kir et al., 2014). In another  
74 example, adipose triglyceride lipases have been implicated in cachexia, since mice lacking  
75 these lipases become resistant to cancer-induced fat loss (Das et al., 2011). In addition, tumors  
76 often elicit massive inflammation in distant organs, which is thought to affect whole-  
77 organismal physiology (Egeblad et al., 2010; Fearon et al., 2012; McAllister and Weinberg,  
78 2014; Owusu-Ansah and Perrimon, 2015). These tumor-induced phenomena are highly  
79 heterogeneous: the same tumors do not always cause the same systemic phenotypes (Fearon  
80 et al., 2012). This indicates that these phenotypes are influenced by host genotype and  
81 physiology, and *vice versa*, and thus appear to behave in a context-dependent manner. Most  
82 importantly, as described above, even in cachexia, a well-known tumor-induced phenotype,  
83 only a small set of host genes responsible for this phenomenon have been identified.

84 Zebrafish is an emerging model for studying tumors (White et al., 2013) and  
85 tumor-organ interaction due to its plethora of advantages including (i) they are a vertebrate  
86 that gives rise to numerous offspring at once, (ii) larvae are transparent, enabling researchers  
87 to observe tumorigenesis and tumor-induced phenotypes easily in live animals, (iii) they are  
88 small enough to allow whole-organismal level experiments, and (iv) genetic manipulations  
89 are relatively easy and affordable when compared especially to mice. As a good example,  
90 zebrafish melanoma models have provided various insights into melanoma development in  
91 vivo (Kaufman et al., 2016; Lister et al., 2014; Santoriello et al., 2010; White et al., 2011).  
92 Zebrafish genetic tumor models currently available often develop tumors at relatively later  
93 stages of zebrafish development, mostly after pigmentation (White et al., 2013). In such cases,  
94 it takes time (several weeks to months) to obtain tumor-bearing fish, and they are already  
95 opaque when tumors arise unless the *casper* mutation is introduced (White et al., 2008).  
96 Hence, it would be meaningful to create a novel zebrafish tumor model where tumor  
97 formation and proliferation occur in the transparent stage of zebrafish development.

98 Furthermore, as is the case for zebrafish, most animal tumor models develop tumors at an  
99 adult stage, thereby preventing us from investigation into how tumors affect growing, juvenile  
100 vertebrates. For these reasons, a novel zebrafish tumor model is required.

101 In the current study, we successfully generated a novel intestinal tumor model.  
102 Careful characterization of this model led to the identification of four tumor-induced  
103 phenotypes including systemic inflammation, hepatomegaly, growth defects, and organismal  
104 death, which are seen even in human cancer patients. Anomalies in gene expression and  
105 metabolism were found in both the intestinal tumor and the distant liver upon whole-  
106 organismal level transcriptome analysis. On the basis of these, we found that a tumor-liver  
107 crosstalk, which can be defined by reduced expression of hepatic *cyp7a1* accompanied with  
108 altered cholesterol-bile acids flux, promote infiltration of neutrophils to the liver (liver  
109 inflammation) in tumor-bearing fish.

110

111 **Results**

112 ***pInt-Gal4-driven kras<sup>G12D</sup> expression causes outgrowth of posterior intestine, leading to***  
113 ***formation of the intestinal tumor***

114 In order to generate a zebrafish model of tumorigenesis with early onset, we sought for *Gal4*  
115 line(s) capable of driving gene expression to a single organ (ie. organ specificity) at an early  
116 stage of zebrafish development. To this end, we crossed a set of *Gal4* lines (Asakawa and  
117 Kawakami, 2008; Asakawa et al., 2008) with a line *Tg(5×UAS:EGFP-P2A-kras<sup>G12D</sup>)*  
118 generated in this study with the Tol2 system (Fig. 1A and Table S1) (Kawakami, 2004;  
119 Kawakami et al., 1998). *Tg(5×UAS:EGFP-P2A-kras<sup>G12D</sup>)* harbored a mutated *kras*, *kras<sup>G12D</sup>*,  
120 one of the most prevalent driver oncogenes in human malignant tumors (Fig. 1A and Table  
121 S1) (Schubbert et al., 2007). Expression of *kras<sup>G12D</sup>* was linked with *EGFP* by *P2A*, a self-  
122 cleaving peptide sequence (Kim et al., 2011). Tissue outgrowth of *kras<sup>G12D</sup>*-positive cells was  
123 examined using fluorescence stereoscopic microscope within approximately 48 hours after  
124 observation of *Gal4*-dependent EGFP expression in a target organ.

125 Lines were identified showing the requisite expression in posterior intestinal cells  
126 (*pInt-Gal4*), anterior intestinal cells (*aInt-Gal4*), brain (*Brain-Gal4*), and liver (*Liver-Gal4*)  
127 (Fig. 1). From these, *pInt-Gal4* was chosen for further characterization due to its ability to  
128 cause efficient outgrowth of posterior intestinal cells upon *kras<sup>G12D</sup>* expression (Fig. 1B-1E).  
129 *aInt-Gal4* was also able to cause outgrowth of anterior intestinal cells (Figs. 1F-1I). However,  
130 outgrowth of intestinal cells by *aInt-Gal4* was less dramatic when compared to that by *pInt-*  
131 *Gal4*. Moreover, expression of *aInt-Gal4*, despite specific after 5 dpf, was somewhat non-  
132 specific during 2-4 dpf, leading to abnormal growth of epidermal cells in a temporal manner  
133 (Fig. S1A-1D).

134 *pInt-Gal4* expression judged by EGFP expression was detectable from 4 dpf (days  
135 post-fertilization) ~ 5 dpf (Fig. 2A-2B). Outgrowth of posterior intestinal cells by *pInt-Gal4-*  
136 driven *kras<sup>G12D</sup>* expression was evident at 5 dpf (Fig. 2A-2B). Oncogene expression was  
137 confirmed by qPCR (Fig. 2C and Table S1). Moreover, 100% of fish harboring both *pInt-*  
138 *Gal4* and *5×UAS:EGFP-P2A-kras<sup>G12D</sup>* exhibited the outgrowth phenotype at 5 dpf (Fig. S2A).

139 Thus, at this stage, we were able to phenotypically discriminate tumor-bearing fish. The  
140 number of intestinal cells determined by DAPI-staining in *kras<sup>G12D</sup>*-expressing fish was  
141 significantly increased compared to that in the controls expressing EGFP under the regulation  
142 by *pInt-Gal4* (Fig. 2D-2J). In the previous study, Wallace et al. show that the mitotic rate of  
143 intestinal epithelial cells is high (~ 40%) through 3 dpf, dropping at 4 ~ 5 dpf (< 5 %)  
144 (Wallace et al., 2005). Despite the assumption that the majority of intestinal cells are post-  
145 mitotic at 5 dpf, we counted the number of mitotic cells by pH3 (phosphorylated histone H3)-  
146 staining (Fig. 2K-2S) and BrdU-incorporation experiments at this time point (Fig. S2B-S2J).  
147 The number of pH3-positive mitotic cells (Fig. 2K-2S) and BrdU-incorporated cells (Fig.  
148 S2B-S2J) were consistently higher in *kras<sup>G12D</sup>*-expressing fish than in the sibling controls,  
149 strongly suggesting that *pInt-Gal4*-driven *kras<sup>G12D</sup>* expression promoted mitosis of intestinal  
150 cells.

151           Upon closer examination of *kras<sup>G12D</sup>*-expressing posterior intestine, we found that  
152 *pInt-Gal4* was expressed in *cdh1* (E-cadherin)-positive intestinal cells (Fig. 3A-3H),  
153 indicating that expression of *pInt-Gal4* occurred specifically in epithelial cells in the posterior  
154 intestine. Fig. 3A-3H demonstrated that intestinal epithelial cells outgrew apically while the  
155 basal membrane structure seemed unaffected with hematoxylin and eosin (HE) staining  
156 supporting these findings (Fig. 3I-3L). Based on these atypia phenotypes, it was likely that  
157 *pInt-Gal4*-driven *kras<sup>G12D</sup>* expression in the posterior intestine led to dysplasia, a type of  
158 tumor. Despite the disorganized structure of posterior intestine, the intestinal lumen was not  
159 completely disrupted (Fig. 3I-3L). Consistent with this, food was present in the intestinal  
160 lumen of tumor-bearing fish following feeding (Fig. S3A-S3B).

161           We did not observe visible invasion and dissemination of EGFP positive cells in  
162 our experimental window (Fig. 3A-3L). Despite this, qPCR experiments demonstrated that  
163 expression of matrix metalloproteinases genes (*mmp9*, *mmp13* and *mmp14b*) was strongly  
164 increased in *kras<sup>G12D</sup>*-expressing intestinal cells, a molecular clue for invasiveness of tumor  
165 cells (Fig. 3M-3O) (Hanahan and Weinberg, 2011). Altogether, these suggest that the detected  
166 outgrowth of intestinal epithelial cells resulted in formation of dysplasia, and thus an

167 intestinal tumor. According to the histological definitions for malignant tumor (cancer), lack  
168 of invasion and metastasis implicate that the intestinal tumor might be benign. However,  
169 because our following analyses revealed systemic adverse effects on host by the intestinal  
170 tumor, we in this manuscript simply define our model as an intestinal tumor model.  
171 Collectively, we found a combination of the *Gal4* line and oncogene that drives the intestinal  
172 tumor at an early stage of zebrafish development.

173

#### 174 ***Zebrafish intestinal tumor causes local and distant inflammation***

175 In addition to the classical definitions for cancer (malignant tumor), recent advances in  
176 molecular biology have revealed a set of molecular features that is useful to characterize  
177 cancer, known as the hallmarks of cancer (Hanahan and Weinberg, 2011). For example, it is  
178 known that cancer recruits innate immune cells such as neutrophils for survival and for  
179 promoting metastasis, and that cancer causes systemic, distant inflammation, phenomena  
180 observed across species including human patients (Fearon et al., 2012; Hanahan and  
181 Weinberg, 2011; McAllister and Weinberg, 2014). Importantly, zebrafish models have played  
182 important roles in this field, providing significant insights into the dynamics of innate  
183 immune cells in such as tumor initiation in vivo (Feng et al., 2012; Feng et al., 2010; Mione  
184 and Zon, 2012; Patton, 2012). In order to determine if the intestinal tumor recruits neutrophils  
185 and causes systemic inflammation, we generated tumor-bearing fish carrying *Tg(lyz:EGFP)*,  
186 which expresses EGFP in neutrophils (Kitaguchi et al., 2009).

187           Microscopic analyses showed considerable increase for the number neutrophils at  
188 the whole-organismal level in tumor-bearing fish at 7 dpf (Fig. 4A-4H). Immunostaining with  
189 anti-Lyz antibody revealed that neutrophils were accumulated in the intestinal tumor when  
190 compared to the normal intestine (Fig. 4I-4O). During the course of the experiments, we noted  
191 that neutrophils had also infiltrated the liver (Fig. 4P-4Q). In order to better visualize tumor-  
192 induced liver inflammation, mCherry was expressed specifically in the liver using the liver  
193 specific *fabp10a* promoter (*Tg(fabp10a:mCherry)*) (Fig. 4P-4Q) (Her et al., 2003). We  
194 counted the number of EGFP-positive neutrophils in the liver expressing mCherry. As a result,



195 we found that the number of neutrophils in the intestines of tumor-bearing fish was greater  
196 than that in the sibling controls ( $12 \pm 2.3$  vs  $30 \pm 6.0$ ,  $p = 0.0062$ ; Fig. 4P-4Q). With respect to  
197 local and systemic inflammation, the intestinal tumor we developed appeared to harbor a  
198 feature of cancer (malignant tumor). Furthermore, the livers of tumor-bearing fish were larger  
199 than those of their sibling controls, a phenomenon known as hepatomegaly ( $0.028 \pm 0.0013$   
200  $\text{mm}^2$  vs  $0.038 \pm .00016 \text{ mm}^2$ ,  $p = 0.00016$ ; Fig. 4S). Tumor-induced hepatomegaly is seen  
201 also in mammalian tumor models including a colon cancer model (Bonetto et al., 2016; Hojo  
202 et al., 2017), and human cancer patients (Liefvers et al., 2009). These results suggest that the  
203 intestinal tumor adversely affects the liver, and that the model is able to recapitulate tumor-  
204 induced phenotypes observed in mammals and human patients.

205

#### 206 ***Zebrafish intestinal tumor impedes organismal growth and causes organismal death***

207 Next, to further demonstrate utility of the novel intestinal tumor model, we aimed to identify  
208 other systemic effects caused by the intestinal tumor. We found that tumor-bearing zebrafish  
209 were significantly smaller than the sibling controls (Figs. 5A and S4), the difference  
210 observable from 7 dpf. The results varied among clutches at 7 dpf, whereas the growth defect  
211 phenotype was very consistent at 9 dpf (Fig. S4A-S4B). The growth defect phenotype was  
212 identified in the complete absence of foods (i.e. exogenous nutrient): although zebrafish  
213 larvae are able to eat from 5-6 dpf, yolk-derived nutrient inherited from the mother keep fish  
214 alive without visible abnormalities at least until 9 dpf. This enabled us to ignore experimental  
215 variations on zebrafish behaviors related to eating and on nutrient absorption rate in the  
216 intestine in explaining the growth defect phenotype. Based on these analyses, we concluded  
217 that the local intestinal tumor caused a systemic growth defect.

218           It is well-known that tumor-bearing animals waste muscle and fat, resulting in a  
219 loss of weight (i.e. tumor-induced cachexia) (Das et al., 2011; Fearon et al., 2012; Figueroa-  
220 Clarevega and Bilder, 2015; Kwon et al., 2015). In fact, Kwon et al. find that fly tumor alters  
221 homeostasis of systemic lipids including triglyceride TG (Kwon et al., 2015). To explore  
222 whether the growth defect phenotype could be attributed to cachexia, Oil Red O staining for

223 neutral TGs and lipids was performed. Stronger staining was detected for the liver and brain  
224 at 9 dpf, a pattern of which was not prominently different between tumor-bearing fish and the  
225 sibling controls (Fig. 5B-5E). This suggested that the intestinal tumor at this stage did not  
226 have a strong impact on the systemic lipid level. In addition, HE staining did not find obvious  
227 loss of host tissues such as muscles at 9 dpf (Fig. 5F-5G). These were consistent with qPCR  
228 data showing that *elif4ebp1*, a marker for reduced insulin signaling (Figueroa-Clarevega and  
229 Bilder, 2015; Kwon et al., 2015), was not affected by the intestinal tumor (Fig. 5H). Thus, the  
230 growth defect phenotype we identified was unlikely to be canonical cachexia (Figueroa-  
231 Clarevega and Bilder, 2015; Kwon et al., 2015).

232           Next we asked if the intestinal tumor worsens mortality of zebrafish. We counted  
233 the number of dead and live fish every day and found that the survival rate of tumor-bearing  
234 fish (less than 50% at 14 dpf) was significantly lower than that of the sibling controls  
235 (approximately 80%; Fig. 5I). This phenotype was not due to a complete defect in swimming  
236 ability and/or a complete loss of appetites in tumor-bearing fish, because tumor-bearing fish  
237 were able to swim and eat (Figs. S3A-S3B). Importantly, visible metastases were still not  
238 detected by microscopic inspection at 14 dpf (unpublished observation), indicating that the  
239 local intestinal tumor affected the survival rate.

240           Taken together, the intestinal tumor driven by strong oncogene *kras*<sup>G12D</sup> expression  
241 was histologically classified as dysplasia, a type of benign tumor, but yet detrimental for  
242 organismal physiology, causing inflammation, hepatomegaly, growth defects, and organismal  
243 death. Practically, our novel intestinal tumor model is useful in that the major systemic  
244 phenotypes, which are clinically observed, occur within 2 weeks after fertilization, when  
245 zebrafish larvae are still small and transparent.

246

247 ***Zebrafish intestinal tumor reduces hepatic *cyp7a1* expression and lowers the bile acids***  
248 ***synthesis***

249 To examine the effects of the intestinal tumor on host at the gene expression level and identify  
250 differentially expressed genes (DEGs), whole-organismal level RNA-seq experiments were

251 performed. Zebrafish at 7 dpf were roughly dissected into the three parts, the liver, the  
252 intestinal tumor or normal intestine, and the rest part of body (Fig. 6A and Table S2-S6). We  
253 were particularly focused on the liver since the liver was preferentially inflamed by the  
254 intestinal tumor (Fig. 4), despite a lack of visible metastasis to the liver in our experimental  
255 setting. A set of genes potentially affected by the intestinal tumor (Table S2-S6) was used for  
256 further validation by qPCR to identify consistently affected genes: RNA-seq experiments  
257 served as a screening to find candidate DEGs.

258 Notably, we found that hepatic *cyp7a1*, the gene encoding the rate-limiting enzyme  
259 that acts at the 1st step of converting cholesterol to bile acids (BAs) (Kuipers et al., 2014;  
260 Thomas et al., 2008), was decreased in the presence of the intestinal tumor (Fig. 6B). Total  
261 BAs were then individually quantified, and fish from multiple clutches were analyzed to test  
262 whether reduced *cyp7a1* expression resulted in a consequent drop in BAs. The colorimetric  
263 quantitative assay demonstrated that total BAs levels were significantly reduced (~50%) in  
264 tumor-bearing fish both at 7 dpf and 9 dpf (Figs. 6C). Despite the reduction in total BAs  
265 levels, total cholesterol levels were not significantly affected by the intestinal tumor (Fig.  
266 S5A). These data suggested that the zebrafish intestinal tumor disrupts the hepatic BAs  
267 synthesis via down-regulation of *cyp7a1* in the liver, anomaly that could account for the  
268 systemic phenotypes caused by the intestinal tumor.

269 We next analyzed our RNA-seq data on the normal intestine and the intestinal  
270 tumor. Comparison between these two samples identified a set of genes strongly elevated in  
271 the intestinal tumor (Fig. 6D). DEGs included inflammatory response genes including  
272 *interleukin 1b (il1b)* and *matrix metalloproteinase 13 (mmp13)*, and *myeloid-specific*  
273 *peroxidase (mpx)* (a marker for neutrophils and macrophages), which were in line with our  
274 imaging data (Fig. 4I-O), and known RAS targets such as *gamma-glutamyltranspeptidase 1*  
275 (*ggt1*) (Figs. 3N and S5B-S5C). Moreover, several secreted factors were elevated including  
276 *leptin b (lepb)*, *insulin-like growth factor binding protein 1a (igfbp1a)*, *insulin-like peptide 5*  
277 *a/b (insl5a and b)*, *fibroblast growth factor 21 (fgf21)*, *interleukin 22 (il22)*, and *il1b* (Fig. 6D).  
278 The secreted protein-coding genes up-regulated in the intestinal tumor were considered as

279 promising candidates that may reduce the production of hepatic BAs and/or underlie the  
280 systemic phenotypes. Fgf19 and Fgf21 in mice have a role in controlling BAs synthesis  
281 (Degirolamo et al., 2016). Insulin antagonist ImpL2 causes cachexia in *Drosophila*, and  
282 IGFbps have been implicated in mammalian cancers (Baxter, 2014; Figueroa-Claevega and  
283 Bilder, 2015; Kwon et al., 2015). *insl5* encodes a peptide that belongs to a relaxin family as  
284 well as fly Dilp8 (Burnicka-Turek et al., 2012; Grosse et al., 2014). Mouse studies reported a  
285 role for Insl5 in glucose homeostasis and the orexigenic signaling, but its function in tumor-  
286 associated pathology is unknown (Burnicka-Turek et al., 2012; Grosse et al., 2014). It is also  
287 possible that inflammatory cytokines such as *illb* and *tnf* reduces expression of hepatic  
288 *cyp7a1* (Okin and Medzhitov, 2016). Overall, the whole-animal level RNA-seq experiments  
289 and qPCR revealed the intriguing abnormality in the liver metabolism coincident with de-  
290 regulated expression of secreted protein-coding genes in the intestinal tumor.

291

### 292 ***Driving cyp7a1 expression in the liver ameliorates tumor-induced liver inflammation***

293 In order to ask whether the reduced *cyp7a1* expression in the liver affects tumor-induced  
294 systemic phenotypes, we generated a transgenic line expressing *cyp7a1* under the control of  
295 the *fabp10a* promoter (Her et al., 2003). Expression of *cyp7a1* was linked to mCherry with  
296 P2A (Kim et al., 2011) (Fig. 7A). The transgene expression was ascertained by microscopic  
297 observation and qPCR (Fig. 7B-7D). Overexpression of *cyp7a1* in the liver significantly  
298 restored total BAs levels both at 7 and 9 dpf in tumor-bearing fish (Figs. 7E-7F). The  
299 transgene also tended to increase total BAs in their tumor-free sibling controls. Altogether, the  
300 *fabp10a:mCherry-P2A-cyp7a1* transgene was able to restore the BAs production in tumor-  
301 bearing fish, further supporting that the intestinal tumor affects cholesterol-BAs flux via  
302 down-regulation of *cyp7a1*.

303         These results promoted us to test if overexpression of *cyp7a1* in the liver could  
304 rescue the intestinal tumor-induced systemic phenotypes. We examined whether three major  
305 tumor-induced phenotypes, liver inflammation, hepatomegaly, and the growth defect, were  
306 rescued by the *fabp10a:mCherry-P2A-cyp7a1* transgene (Fig. 8). We found that *cyp7a1*

307 overexpression did not significantly rescue the growth defect phenotype (Fig. 8A). As was the  
308 case for Fig. 5A, the results to some extent varied depending on clutches: in one clutch, we  
309 observed a trend for the rescue while not in a different clutch. Upon pooling data from  
310 multiple clutches, we concluded that *cyp7a1* overexpression did not consistently and  
311 significantly rescue the growth defect phenotype. Moreover, tumor-induced hepatomegaly  
312 ( $0.028 \pm 0.0013 \text{ mm}^2$  (control) vs  $0.038 \pm 0.0016 \text{ mm}^2$  (tumor),  $p = 0.00016$ ; Fig. 4S) was not  
313 affected by *cyp7a1* overexpression in the liver ( $0.028 \pm 0.0011 \text{ mm}^2$  (control) vs  $0.033 \pm$   
314  $0.0018 \text{ mm}^2$  (tumor),  $p = 0.012$ ; Fig. 8B-8D).

315 Interestingly, the number of neutrophils observed in the liver was comparable  
316 between the sibling controls and tumor-bearing fish in the *Tg(fabp10a:mCherry-P2A-cyp7a1)*  
317 background ( $9.7 \pm 2.8$  (control) vs  $16 \pm 4.4$  (tumor),  $p = 0.134$ ; Fig. 8B-8C, and 8E) in  
318 contrast to our data in the *Tg(fabp10a:mCherry)* background ( $12 \pm 2.3$  (control) vs  $30 \pm 6.0$   
319 (tumor),  $p = 0.0062$ ; Fig. 4P-4Q). As an important detail, these experiments (Figs. 4R-4S and  
320 8B-8E) were performed using staged-matched fish (7 dpf), which was demonstrated by that  
321 liver size and the number of neutrophils were similar in the control groups. Despite  
322 statistically insignificant, there was still a trend for the increase in the number of neutrophils  
323 in tumor-bearing fish in the *Tg(fabp10a:mCherry-P2A-cyp7a1)* background. This might  
324 suggest that the rescue by *Tg(fabp10a:mCherry-P2A-cyp7a1)* was partial, consistent with that  
325 the extent of rescue for total BAs levels were not 100 % (Fig. 7E-7F). Alternatively, another  
326 factor might contribute to liver inflammation by the intestinal tumor.

327 *cyp7a1* has not been considered as a crucial host gene in tumor-induced distant  
328 inflammation. Yet, studies in different contexts support our observation that the intestinal  
329 tumor actively reduces expression of hepatic *cyp7a1* to promote liver inflammation (Fig. 9).  
330 In mice, overexpression of Cyp7a1 in the liver suppresses lipopolysaccharide (LPS)-induced  
331 hepatic inflammation and fibrosis (Liu et al., 2016). It is also known that sustained  
332 inflammation reduces expression of Cyp7a1, suggestive of a role for Cyp7a1 in inflammation  
333 in mice (Okin and Medzhitov, 2016). Collectively, the current study, as the demonstration for  
334 utility of the model, identifies *cyp7a1* as a host gene that mediates liver inflammation, one of

335 tumor's adverse effects on host by the intestinal tumor.

336

337 **Discussion**

338 This study has two major advances. First, we established the novel zebrafish intestinal tumor  
339 model, which is optimized for studying body-wide tumor-organ interaction in vivo. Second,  
340 using the model, we discovered a tumor-liver interaction that mediates enhanced recruitment  
341 of neutrophils to the liver in tumor-bearing fish, via down-regulation of a cholesterol-  
342 metabolizing gene *cyp7a1* as a critical host gene.

343

344 ***Establishment of a novel intestinal tumor model in zebrafish***

345 The zebrafish intestinal tumor model we have newly established harbors several strengths for  
346 studying tumor-organ interaction at the whole-organismal level (Fig. 7). The combination of  
347 *pInt-Gal4* and UAS-controlled *kras<sup>G12D</sup>* induces epithelial tumor formation in the posterior  
348 intestine at as early as 5 dpf, when zebrafish are small and completely transparent (Figs. 1-3).  
349 Yet, zebrafish larvae after 5 dpf are able to swim and eat and therefore it is likely that  
350 essential organs such as the liver are already mature at this time point. Even though the  
351 intestinal tumor is histologically dysplasia (not fully malignant), the intestinal tumor causes  
352 detrimental effects on host including systemic inflammation, hepatomegaly, a growth defect,  
353 metabolic defects, and organismal death (Figs. 4-8). The model even made it possible to  
354 visualize the intestinal tumor-induced inflammation in the liver of live fish (Fig. 4).  
355 Furthermore, the growth defect phenotype we discovered does not depend on exogenous food  
356 intake, simplifying our investigation on how the intestinal tumor causes systemic growth  
357 defect (Fig. 5).

358 To date, a genetically engineered, robust zebrafish intestinal tumor model has not  
359 yet been available (Lobert et al., 2016). The structure of intestinal tract in zebrafish is  
360 different from mice and humans, especially in that zebrafish lacks the stomach. Still, the  
361 zebrafish intestine shares common features with mammalian intestines, the notion validated  
362 by anatomical analysis and comprehensive gene expression study (Lobert et al., 2016;  
363 Wallace et al., 2005; Wang et al., 2010). On the basis of these, the zebrafish intestine appears  
364 to be analogous to the small intestine, colon, and rectum of mammals. Relevance to human

365 diseases of our model is also supported by that the intestinal tumor model exhibits liver  
366 phenotypes observed in murine colon tumor models such as *Apc*<sup>Min/+</sup> and human patients  
367 (Bonetto et al., 2016; Lieffers et al., 2009; Narsale et al., 2015): it is of note that *Apc*<sup>Min/+</sup> is a  
368 model of adenoma (histologically benign) and potent to cause adverse effects on host.  
369 Therefore, histological classification of tumors (benign or malignant) does not always  
370 correlate with the degree of adverse effects on host. Taken together, we expect that our model  
371 will be a valuable tool for studying biology of intestinal tumors.

372           It is also important to note that there are other zebrafish models that develop  
373 tumors at an early stage of zebrafish development, which are thus potentially useful for  
374 studying tumor-organ crosstalk at the whole organismal level. For instance, Mione and  
375 colleagues established a novel brain tumor model using *HRAS*<sup>V12</sup>, in which increased brain  
376 size was observed already at 3 dpf (Mayrhofer et al., 2017). Activating beta-catenin signal  
377 promotes liver enlargement associated with enhanced proliferation at 6 dpf in the model  
378 established by Stainier and colleagues (Evason et al., 2015). These models are definitely  
379 useful to obtain insights into how various types of local tumors affect developing vertebrates.

380

### 381 ***Identification of a tumor-induced growth defect in developing zebrafish***

382 Our model exhibits an intriguing systemic phenotype: tumor-bearing fish do not grow well  
383 compared to their sibling controls (Fig. 5A). This phenotype was neither accompanied with a  
384 clear reduction of the systemic lipid level (Fig. 5B-5E) nor with reduced insulin signaling (Fig.  
385 5H), common phenotypes observed in cachexia patients and animal models (Fearon et al.,  
386 2012; Figueroa-Clarevega and Bilder, 2015; Kwon et al., 2015). Hence, we at this point  
387 assume that the observed growth defect is not the typical tumor-induced cachexia.

388           The growth defect phenotype to some extent resembled the growth delay in flies  
389 harboring an imaginal disc tumor or local wounds (Colombani et al., 2015; Colombani et al.,  
390 2012; Garelli et al., 2012; Garelli et al., 2015; Katsuyama et al., 2015; Owusu-Ansah and  
391 Perrimon, 2015; Vallejo et al., 2015). Secreted fly-specific peptide Dilp8 and its receptor Lgr3  
392 are at the core of adaptation of growth and developmental timing to local disruptions. Dilp8



393 interacts with Lgr3 expressed in neurons that are projected to the prothoracic gland to control  
394 biosynthesis of ecdysone, one of the master regulators for fly development (Colombani et al.,  
395 2015; Garelli et al., 2015; Vallejo et al., 2015). However, whether similar growth retardation  
396 occurs in vertebrate tumor models has not been validated. Our study demonstrates the first  
397 vertebrate model in which the local intestinal tumor impedes organismal growth. Secreted  
398 protein-coding genes such as *insl5a* up-regulated in the intestinal tumor may act as an  
399 upstream of the growth defect (Fig. 6D-6E).

400           Recent advances in pediatric oncology have greatly improved the survival rate of  
401 childhood cancer patients. Importantly, it is known that survivors of childhood cancers often  
402 have "late complications," long-lasting (sometimes for 40-years) complications including  
403 growth defects (Robison and Hudson, 2014; Rose et al., 2016). Cancers by themselves and/or  
404 cancer treatments (e.g. chemotherapy) may cause late complications, but the details are still  
405 unknown. Our model develops the intestinal tumor at a juvenile stage when zebrafish larvae  
406 grow massively. The study thus points out the possibility that local tumor could be a cause for  
407 long-lasting growth defects in human cancer patients. This can be directly addressed once we  
408 have the ability to cure the intestinal tumor in our model so that we can test if the growth  
409 defect lasts even after removal of the intestinal tumor.

410

411 ***The intestinal tumor remotely alters systemic cholesterol-BAs homeostasis through cyp7a1-***  
412 ***mediated tumor-liver interaction to promote liver inflammation***

413 One of the strengths of our model is that the intestinal tumor causes systemic effects when  
414 zebrafish larvae are small enough for the whole-body analysis (Figs. 1-2). This enabled us to  
415 perform whole-organismal transcriptome analysis to capture gene expression changes in the  
416 intestinal tumor and the remaining normal organs (Fig. 6 and Tables S2-S6). We found that  
417 the liver responded to the intestinal tumor in the most sensitive manner in our model (Figs. 4  
418 and 6). In addition to tumor-induced systemic inflammation and hepatomegaly (Fig. 4)  
419 (Egeblad et al., 2010; Fearon et al., 2012; McAllister and Weinberg, 2014), hepatic expression  
420 of *cyp7a1*, the gene encoding the rate-limiting enzyme for synthesizing bile acids (BAs)

421 (Kuipers et al., 2014; Thomas et al., 2008), was decreased at as early as 5-7 dpf in tumor-  
422 bearing fish (Figs. 6C and 6D). This reduction was concordant with the reduced total BAs  
423 levels (Fig. 6E), which was not due to the decreased body size, as we did not find any  
424 correlation between body length and the amount of bile acids in each individual (Fig. S6).  
425 Indeed, rescuing *cyp7a1* expression in the liver by means of the *fabp10a* promoter  
426 significantly restored total BAs levels in tumor-bearing fish (Fig. 7). Intriguingly, this rescue  
427 was associated specifically with buffered liver inflammation (Fig. 8): the number of  
428 neutrophils in the liver was increased in the presence of the intestinal tumor (Fig 4P-R),  
429 which was significantly ameliorated by overexpression of *cyp7a1* in the liver (Fig. 8E-8G).  
430 These results indicate that the intestinal tumor instigates liver inflammation through  
431 modulating expression of *cyp7a1* and cholesterol-BAs flux in the liver. Given that  
432 *Tg(fabp10a:mCherry-P2A-cyp7a1)* did not rescue hepatomegaly and the growth defect, it is  
433 likely that liver inflammation is independent of these phenotypes (Figs. 8-9). Our results were  
434 in line with recent studies showing a role for murine Cyp7a1 in liver inflammation in non-  
435 cancer disease models (Liu et al., 2016; Okin and Medzhitov, 2016), indicative of a  
436 generalizable role for *cyp7a1*-mediated cholesterol-BAs metabolism in diseases. These also  
437 solidify the general utility of our novel tumor model. We emphasize that our findings are of  
438 significance in that we re-defined *cyp7a1* as a host gene critical for mediating the tumor-liver-  
439 neutrophil crosstalk in vivo. It still remains unclear whether total BAs levels and/or altered  
440 cholesterol flux affect the liver, and for what the intestinal tumor causes distant inflammation  
441 in the liver. Further extensive genetic studies are ongoing to reveal physiological significance  
442 of the altered cholesterol-BAs homeostasis in tumor-bearing fish.

443

#### 444 ***Genetics on physiological interaction between tumor and normal organ(s)***

445 Here we provide evidence for the utility of our model by showing that *cyp7a1*-mediated  
446 tumor-liver interaction underlies altered neutrophil dynamics in the livers of tumor-bearing  
447 fish. An importance of hepatic *cyp7a1* in tumor's adverse effects on host has not been  
448 previously appreciated. Thus, the study shows that our approach is powerful to uncover

449 previously unknown contribution of ordinary genes in tumor-induced systemic phenotypes.  
450 Three major questions are to be solved: which tumor-derived factor(s) causes hepatic *cyp7a1*  
451 down-regulation and liver inflammation? Does *cyp7a1*-mediated liver inflammation benefits  
452 the intestinal tumor? What are other host genes responsible for systemic tumor's adverse  
453 effects on host in this model? We are addressing these questions by combining transcriptome  
454 and genetic experiments. Further genetic dissection on such physiologically important tumor-  
455 organ interaction will help to discover a therapy(s) that ameliorates host physiology harmed  
456 by tumors.  
457

458 **Materials & Methods**

459 ***Zebrafish***

460 All animal protocols were approved by the Animal Care and Use committee of Advanced  
461 Telecommunications Research Institute International. AB line was used as the standard line.  
462 Adult fish were reared at 28°C under 14 h/10 h light/dark cycle and fed hatched brine shrimp  
463 and the Hikari Lab 130 food (KYORIN). Fish were fed twice a day except weekends and  
464 holidays (once a day). Embryos were obtained by mating male fish with female fish in a water  
465 tank and were maintained at 28°C in egg water (3% sea salts, 6.4 nM methylene blue) in a  
466 plastic petri dish. Tricaine methanesulfonate (MS-222) was used as an anesthetic reagent at  
467 the concentration of 0.008% in egg water.

468

469 ***Transgenic lines and plasmid construction***

470 The transgenic zebrafish lines, gSAIzGFFD1105A (*pInt-Gal4*), gSAIzGFFM103B (*aInt-*  
471 *Gal4*), gSAIzGFFD886A (*Liver-Gal4*), and gSAGFF138A (*Brain-Gal4*), were generated by  
472 Tol2-transposon mediated gene trap and enhancer trap methods as described previously  
473 (Asakawa and Kawakami, 2008; Kawakami et al., 2016). *Tg(lyz:EGFP)* were obtained from  
474 National Bioresource Project Zebrafish Core Institution under the approval of the developer  
475 (Kitaguchi et al., 2009). The constructs for generating *Tg(5×UAS:EGFP-P2A-kras<sup>G12D</sup>)*,  
476 *Tg(fabp10a:mCherry)* and *Tg(fabp10a:mCherry-P2A-cyp7a1)* were generated by PCR,  
477 combining the synthesized oligos and fragments amplified from the WT genome (Her et al.,  
478 2003; Omae et al., 2013). The sequences are provided in Table S1. Generation of  
479 *Tg(5×UAS:EGFP-P2A-kras<sup>G12D</sup>)* was performed as described previously (Kawakami, 2004;  
480 Thermes et al., 2002). I-SceI meganuclease was purchased from New England Biolabs and  
481 used for generating *Tg(fabp10a:mCherry)* and *Tg(fabp10a:mCherry-P2A-cyp7a1)* (Thermes  
482 et al., 2002). The existence of mCherry or EGFP-encoding transgene was inspected using  
483 Leica M165 FC fluorescent stereoscopic microscope (Leica)

484

485 ***Screening of transgenic Gal4 lines that can drive tumorigenesis***

486 *Tg(5×UAS:EGFP-P2A-kras<sup>G12D</sup>)* line was mated to each *Gal4* line carrying heterozygous  
487 *Gal4* transgene. As an example, *Tg(5×UAS:EGFP-P2A-kras<sup>G12D</sup>)<sup>+Tg</sup>* fish was crossed with  
488 *Tg(pInt-Gal4)<sup>+Tg</sup>; Tg(UAS:EGFP)<sup>+Tg</sup>* fish to obtain *Tg(5×UAS:EGFP-P2A-kras<sup>G12D</sup>)<sup>+Tg</sup>; Tg(pInt-Gal4)<sup>+Tg</sup>*  
489 embryos. Expression of *kras<sup>G12D</sup>* in the siblings was examined by EGFP  
490 expression using Leica M165 FC fluorescent stereoscopic microscope (Leica). When fish  
491 with a potentially tumorous phenotype were identified, fish with no EGFP expression from  
492 the same clutch (i.e. a clutch includes siblings born on the same day from the same parents)  
493 were considered as their sibling controls. In cases where no observable phenotype could be  
494 discerned, *kras<sup>G12D</sup>*-expressing fish and the sibling controls were discriminated based on  
495 genotyping experiments. In both cases, fish harboring either *Gal4* or *Tg(5×UAS:EGFP-P2A-*  
496 *kras<sup>G12D</sup>)*, or none of both, served as the sibling controls. For genotyping, genomic DNA was  
497 isolated from single larva by proteinase K (Takara, 1:100 dilution) in 10 mM Tris-HCl (pH  
498 8.0) and 50 mM KCl and used as a PCR template. Each transgene was amplified using KAPA  
499 2G Fast HS (NIPPON Genetics). *tp53* genomic region was used as the PCR control. The  
500 primers used are listed in Table S1.

501

### 502 ***RNA isolation, cDNA synthesis, and quantitative PCR (qPCR)***

503 For gene expression experiments, we often pooled multiple fish in a single tube. This was for  
504 obtaining sufficient amount of high-quality RNAs especially when dissection was performed,  
505 and for lowering the risk to select outliers from the clutch. Given that single female generally  
506 produces more than 50 embryos, selecting e.g. 3 ~ 5 fish from a clutch may give rise to  
507 unwanted bias in sample collection. Pooling multiple fish, 3 ~ 10, depending on the size of  
508 clutches, in a single tube, and treat it as one biological replicate, is useful to reduce these risks.  
509 Total RNA was isolated using TRIzol (Thermo Fisher SCIENTIFIC) or RNeasy Mini Kit  
510 (QIAGEN). cDNA was synthesized using SuperScript III First-Strand Synthesis System  
511 (Thermo Fisher SCIENTIFIC) or Transcriptor First Strand cDNA Synthesis Kit (Roche). The  
512 obtained cDNAs were 5- or 10-fold-diluted and subjected into qPCR experiments by using  
513 LightCycler480 Instrument II system and SYBR Green Master Mix (Roche). The obtained

514 data were analyzed using the delta-Ct method. The primers used are listed in Table S1.

515

516 ***Cryosectioning and fluorescent immunohistochemistry***

517 *Tg(5×UAS:EGFP-P2A-kras<sup>G12D</sup>)<sup>+Tg</sup>*; *Tg(pInt-Gal4)<sup>+Tg</sup>* and *Tg(pInt-Gal4)<sup>+Tg</sup>*;

518 *Tg(UAS:EGFP)<sup>+Tg</sup>* larvae from the same clutch were used. At 5 dpf, larvae were collected

519 and fixed in 4% paraformaldehyde (PFA) in PBS at 4°C for overnight. Larvae were then

520 washed with PBS for five times and then embedded in 1.2% agarose and 5% sucrose in PBS.

521 Agarose blocks were trimmed by a razor and then incubated in PBS containing 30% sucrose

522 at 4°C for overnight. After replacement with 30% sucrose solution, blocks were frozen on dry

523 ice and stored at -80°C until cryosectioning. Larvae were transversely sectioned (thickness =

524 16 μm) using a Leica CM 3050 S (Leica) and sections posterior to the swimming bladder

525 were collected (one section per individual). Cryosections were adhered on a MAS-GP typeA-

526 coated slide glass (MATSUNAMI GLASS Ind., LTD) and air-dried at room temperature for

527 30 min. Sections were rehydrated by PBS at room temperature for 30 min, and then

528 permeabilized and blocked with 5% normal goat serum in PBS supplemented with 0.5%

529 TritonX-100 (0.5% PBT) for 1 h. Sections were then incubated with the following primary

530 antibodies diluted in 5% normal goat serum in 0.5% PBT at 4°C for overnight: rabbit anti-

531 phosphorylated-Histone H3 (Ser10) (pH3) (EMD Millipore, 06-570; 1:100 dilution) and

532 rabbit anti-E-cadherin (cdh1) (Gene Tex, GTX125890; 1:100 dilution). Sections were washed

533 with 0.5% PBT and then incubated with secondary antibody, Alexa Fluor 568 conjugating

534 anti-Rabbit IgG (Life Technology; 1:400 dilution), at room temperature for 1 h. Sections were

535 washed with 0.5% PBT and then mounted with ProLong Gold Antifade Mount with DAPI

536 (Thermo Fisher SCIENTIFIC). Fluorescent images were taken by Nikon A1R confocal laser

537 microscope (Nikon).

538

539 ***BrdU incorporation, cryosectioning and fluorescent immunohistochemistry***

540 *Tg(5×UAS:EGFP-P2A-kras<sup>G12D</sup>)<sup>+Tg</sup>*; *Tg(pInt-Gal4)<sup>+Tg</sup>* and *Tg(pInt-Gal4)<sup>+Tg</sup>*;

541 *Tg(UAS:EGFP)<sup>+Tg</sup>* larvae from the same clutch were used. BrdU incorporation experiments  
542 were performed essentially as described previously (Takada et al., 2010). At 4 dpf, 20 larvae  
543 were transferred into egg water containing 0.5 mM Bromodeoxyuridine (BrdU; nakalai  
544 tesque) and incubated for 24 h. At 5 dpf, larvae were rinsed with egg water and then fixed  
545 with 4% PFA in PBS. Agarose embedding and cryosectioning were performed as described  
546 above. After rehydration of cryosections by PBS, sections were treated with 2N hydrochloric  
547 acid to denature DNA at room temperature for 1 h and then washed with PBS. Blocking and  
548 antibody treatment were performed as described above. Primary antibodies, mouse anti-BrdU  
549 antibody (The Developmental Studies Hybridoma Bank, G3G4; 1:500 dilution) and rabbit  
550 anti-GFP antibody (MBL, 598; 1:500 dilution), and secondary antibodies, Alexa Fluor 568  
551 conjugating anti-Mouse IgG (Life technologies; 1:500 dilution) and Alexa Fluor 488  
552 conjugating anti-Rabbit IgG (Life technologies; 1:500 dilution) were used. Sections were  
553 counterstained with Hoechst33342 (Life technologies; 1:2000 dilution) and mounted with  
554 80% glycerol in PBS. Fluorescent images were taken by Nikon A1R confocal laser  
555 microscope (Nikon).

556

#### 557 ***Whole mount fluorescent immunohistochemistry***

558 *Tg(5×UAS:EGFP-P2A-kras<sup>G12D</sup>)<sup>+Tg</sup>*; *Tg(pInt-Gal4)<sup>+Tg</sup>* and *Tg(pInt-Gal4)<sup>+Tg</sup>*;  
559 *Tg(UAS:EGFP)<sup>+Tg</sup>* larvae from the same clutch were used. At 5 dpf, larvae were fixed in 4%  
560 PFA in PBS at 4°C for overnight. Larvae were washed with PBS for five times and treated  
561 with 3% hydrogen peroxide in 0.5% sodium hydride at room temperature to bleach pigments.  
562 After removing pigments, larvae were washed with PBS and then transferred into methanol,  
563 and stored at -30°C until staining. Larvae were washed with 0.5% PBT for 5 times.  
564 Permeabilization was performed by treating samples with distilled water for 5 min and then  
565 with cold acetone (-30°C) for 5 min. Larvae were washed with 0.5% PBT for 3 times and  
566 blocked with 5% goat serum in 0.5% PBT for 1 h. Larvae were incubated with rabbit anti-  
567 Lysozyme (Lyz) antibody (AnaSpec, AS-55633; 1:200 dilution) diluted in 5% normal goat  
568 serum in 0.5% PBT at 4°C for overnight. After washing with 0.5% PBT, samples were

569 incubated with secondary antibody, Alexa Fluor 568 conjugating anti-Rabbit IgG (Life  
570 Technologies; 1:200 dilution) at room temperature for 1h. Larvae were counterstained with  
571 Hoechst33342 (Life Technologies; 1:2000 dilution) and mounted with PBS containing 80%  
572 glycerol. Fluorescent images were taken by Nikon A1R confocal laser microscope (Nikon).

573

#### 574 ***Paraffin sectioning and HE staining***

575 Zebrafish larvae were fixed in 4% PFA in PBS at 4°C for overnight. Fixed larvae were  
576 dehydrated by a series of diluted ethanol (70, 80, 90, 99.5 and 100%) and xylene. Paraffin  
577 filtration was performed at 65°C for overnight, and then samples were embedded in paraffin  
578 at room temperature. Paraffin sectioning (thickness = 5 µm) was performed with HM 340E  
579 Rotary Microtome (Thermo Fisher SCIENTIFIC). Sections posterior to the pancreas were  
580 collected and deparaffinized by xylene and ethanol treatments, and then stained with Mayer's  
581 Hematoxylin and eosinY (Wako Pure Chemical Industries). Images were taken using Nikon  
582 ECLIPSE Ni-E (Nikon).

583

#### 584 ***Imaging of neutrophils using Tg(lyz:EGFP)***

585 The sibling controls and tumor-bearing fish carrying *Tg(lyz:EGFP)* and  
586 *Tg(fabp10a:mCherry)* or *Tg(fabp10a:mCherry-P2A-cyp7a1)* were obtained from the same  
587 clutch. At 7 dpf, larvae were given an anesthetic by 0.008% MS-222 and mounted in 1%  
588 NuSieve GTG Agarose (Lonza) in egg water. Fluorescent images of the left side of the liver  
589 were obtained using Nikon A1R confocal laser microscope (Nikon). Liver size was measured  
590 using ImageJ software (Schneider et al., 2012). The number of neutrophils overlapping with  
591 mCherry signals (i.e the liver) were manually counted using ImageJ software in all sections  
592 containing the liver (6 µm interval).

593

#### 594 ***Body length measurement***

595 *Tg(5×UAS:EGFP-P2A-kras<sup>G12D</sup>)<sup>+Tg</sup>*; *Tg(pInt-Gal4)<sup>+Tg</sup>* and the sibling controls were obtained



596 from the same clutch. Embryos and larvae were reared in a plastic petri dish in the presence  
597 of egg water without foods. At 7 or 9 dpf, zebrafish larvae were given an anesthetic by  
598 0.008% MS-222 and phenotyped into tumor-bearing fish and the sibling controls. Larvae  
599 were placed on the bottom of a plastic petri dish and lateral view images were taken by Leica  
600 DFC310 FX. Lengths of the lateral side views were measured by ImageJ software.

601

#### 602 ***Oil Red O staining***

603 Oil Red O was purchased from Wako Pure Chemical Industries (Wako) and the experiments  
604 were performed essentially as described previously (Kim et al., 2013), except that we did not  
605 perform a rinse with 2-propanol after Oil Red O treatment.

606

#### 607 ***Survival assay***

608 Twenty larvae of the sibling controls and tumor-bearing fish were reared in a tank from 7 to  
609 14 dpf. Larvae were fed the Hikari Lab 130 food (KYORIN). The numbers of live and dead  
610 fish were counted everyday.

611

#### 612 ***RNA-seq and Bioinformatic analysis***

613 RNA-seq analyses were performed as described previously (Kawaoka et al., 2013; Suzuki et  
614 al., 2014). 7 dpf larvae were dissected under a microscope. The liver, intestine, and the rest  
615 part of the body from 20 ~ 30 of tumor-bearing fish or the sibling controls were pooled and  
616 RNA-extracted. Pooling multiple fish for preparing sequencing libraries was important to  
617 obtain sufficient amount of high-quality RNAs and to minimize the risk to obtain outliers that  
618 cannot represent the clutch used. The obtained gene list with reads per million per a kilobase  
619 (RPKM) scores were shown in Table S2. To identify differentially expressed genes (DEGs),  
620 we first focused on the well-annotated protein-coding genes. RPKM scores were used to  
621 calculate the ratio tumor/control. In this calculation, 1 was added to all RPKM scores to  
622 ignore the scores below "1", and to make analyses more stringent. Recognizing that our  
623 dissection cannot prevent cross-contamination, genes showing more than 0.8-fold-enrichment

624 and > 0 RPKM in the tissue of interest were further considered. The obtained ratios were used  
625 to sort genes to find potential DEGs. As an initial screening to identify reliable DEGs, we  
626 focused on a set of genes showing more than 3-fold changes in the RNA-seq experiments.  
627 Considering possible differences among clutches, the RNA-seq experiment was followed by  
628 qPCR validation with samples prepared from different clutches. Thus, the RNA-seq  
629 experiment functioned as a screening to identify DEGs. Data visualization was done mostly  
630 using ggplot2 (<http://ggplot2.org/>). In main figures, we show genes consistently validated by  
631 qPCR. In our experience with our dataset, the validation rate was high for genes with more  
632 than 3-fold changes in the intestine-derived samples. In the liver and rest part of the body, "3-  
633 fold criteria" was not enough to obtain a high validation rate (i.e. genes showing more than 3-  
634 fold changes such as *pklr* failed to be validated by qPCR (data not shown)). Used in-house R  
635 scripts are all available upon request. RNA-seq data published in the present study have been  
636 deposited under the accession number of DRA005199 in DDBJ (DNA Data Bank of Japan).

637

### 638 ***Metabolite measurement***

639 For measuring total bile acids, single zebrafish larva was homogenized in 500  $\mu$ L of  
640 chloroform: methanol (1:1) solution to extract total lipids. Samples were centrifuged at  
641 20,000 g for 20 min at RT. Supernatants were collected and evaporated. Dried samples were  
642 dissolved in 75  $\mu$ L of R1 reagent of total Bile Acids Assay Kit (DIAZYME, CA, USA), and  
643 then 25  $\mu$ L of R2 reagent were added. Absorbance at 405 nm was measured by Multiskan GO  
644 (Thermo Fisher SCIENTIFIC). Standard curve was generated using dilution series of standard  
645 bile acids. For cholesterol measurements, single zebrafish larva was homogenized in 500  $\mu$ L  
646 of chloroform: methanol (2:1) solution to extract total lipids. Samples were centrifuged at  
647 20,000 g for 20 min at RT. Supernatants were collected and evaporated. Dried samples were  
648 dissolved in 100  $\mu$ L of the assay reagent of the WAKO cholesterol E-test (Wako Pure  
649 Chemical Industries, Osaka, Japan). Absorbance at 405 nm was measured by Multiskan GO.  
650 Standard curve was generated using dilution series of standard cholesterol. The obtained data

651 were shown as box plots generated using ggplot2. Used in-house R scripts are all available  
652 upon request.

653

#### 654 *Statistics and sample size determination*

655 The values of the bar graphs are expressed as average  $\pm$  s.e.m. The error bars (s.e.m.) shown  
656 for all results were derived from biological replicates. Significant differences between two  
657 groups were examined using one or two-tailed, unpaired *t*-test. One-tailed test was chosen  
658 when we had hypothesis regarding direction of changes (increased or decreased) in  
659 experiments. Statistical significance is assumed if  $p < 0.05$ . The sample size was not pre-  
660 determined and chosen as follows. First, the number of animals was minimized as much as  
661 possible in light of animal ethics. Second, against effect size estimated in each experiment,  $\geq$   
662 80%–90% power was favored. Third, in most cases,  $n \geq 5$  was set as a threshold according to  
663 the previous reports (Krzywinski and Altman, 2014). For analyzing the growth defect  
664 phenotype, with the estimated size effect (around 0.98-0.99 fold), larger sample size (e.g.  $n >$   
665 50) was preferred to obtain appropriate statistical power. We did not find apparently abnormal  
666 distribution throughout the study except the controls in Figs. 2S and S2J, where the majority  
667 of controls exhibit 0. No data exclusion was performed.

668

669 **Acknowledgements**

670 We thank Dr. Thomas. N. Sato (T.N.S), the director of The TNS BioMEC-X Laboratories,  
671 ATR, and JST ERATO Sato Live Bio-forecasting project, for supporting all aspects of the  
672 study. We thank Tomoko Kuroda, Tomoko Ninomiya, Satsuki Endo, Fumihiko Sagawa,  
673 Hitomi Anabuki, Satoshi Kozawa, Terumi Horiuchi, and Kiyomi Imamura for technical  
674 assistance. We thank Ryoko Takahashi, Erika Kojima, and Toshiya Morie for administrative  
675 assistance. We thank Dr. Norio Takada and Dr. Sa Kan Yoo for providing valuable suggestions  
676 on zebrafish usage. We thank Dr. Yoichiro Tamori for helpful discussion on tumor  
677 classification. We are thankful to Dr. Pieter Bas Kwak and Dr. Bryce Nelson for critically  
678 reading the manuscript. Thomas. N. Sato and the members of the TNS BioMEC-X  
679 Laboratories provided the insightful comments on the manuscript. This work was supported  
680 by JST ERATO (T.N.S; JPMJER1303) and Uehara Memorial Foundation Research Grant  
681 (S.K). This work was supported by National BioResource Project from AMED (K.K.), JSPS  
682 KAKENHI Grant Number JP15H02370 (K.K.). The funders had no role in study design, data  
683 collection and analysis, decision to publish, or preparation of the manuscript.

684

685 **References**

- 686 **Asakawa, K. and Kawakami, K.** (2008). Targeted gene expression by the Gal4-  
687 UAS system in zebrafish. *Dev Growth Differ* **50**, 391-9.
- 688 **Asakawa, K., Suster, M. L., Mizusawa, K., Nagayoshi, S., Kotani, T., Urasaki,**  
689 **A., Kishimoto, Y., Hibi, M. and Kawakami, K.** (2008). Genetic dissection of neural circuits  
690 by Tol2 transposon-mediated Gal4 gene and enhancer trapping in zebrafish. *Proc Natl Acad*  
691 *Sci U S A* **105**, 1255-60.
- 692 **Baxter, R. C.** (2014). IGF binding proteins in cancer: mechanistic and clinical  
693 insights. *Nat Rev Cancer* **14**, 329-41.
- 694 **Bonetto, A., Rupert, J. E., Barreto, R. and Zimmers, T. A.** (2016). The Colon-  
695 26 Carcinoma Tumor-bearing Mouse as a Model for the Study of Cancer Cachexia. *J Vis Exp*.
- 696 **Burnicka-Turek, O., Mohamed, B. A., Shirneshan, K., Thanasupawat, T.,**  
697 **Hombach-Klonisch, S., Klonisch, T. and Adham, I. M.** (2012). INSL5-deficient mice  
698 display an alteration in glucose homeostasis and an impaired fertility. *Endocrinology* **153**,  
699 4655-65.
- 700 **Colombani, J., Andersen, D. S., Boulan, L., Boone, E., Romero, N., Virolle, V.,**  
701 **Texada, M. and Leopold, P.** (2015). Drosophila Lgr3 Couples Organ Growth with  
702 Maturation and Ensures Developmental Stability. *Curr Biol* **25**, 2723-9.
- 703 **Colombani, J., Andersen, D. S. and Leopold, P.** (2012). Secreted peptide Dilp8  
704 coordinates Drosophila tissue growth with developmental timing. *Science* **336**, 582-5.
- 705 **Das, S. K., Eder, S., Schauer, S., Diwoy, C., Temmel, H., Guertl, B.,**  
706 **Gorkiewicz, G., Tamilarasan, K. P., Kumari, P., Trauner, M. et al.** (2011). Adipose  
707 triglyceride lipase contributes to cancer-associated cachexia. *Science* **333**, 233-8.
- 708 **Degriolamo, C., Sabba, C. and Moschetta, A.** (2016). Therapeutic potential of  
709 the endocrine fibroblast growth factors FGF19, FGF21 and FGF23. *Nat Rev Drug Discov* **15**,  
710 51-69.
- 711 **Egeblad, M., Nakasone, E. S. and Werb, Z.** (2010). Tumors as organs: complex  
712 tissues that interface with the entire organism. *Dev Cell* **18**, 884-901.
- 713 **Evason, K. J., Francisco, M. T., Juric, V., Balakrishnan, S., Lopez Pazmino**  
714 **Mdel, P., Gordan, J. D., Kakar, S., Spitsbergen, J., Goga, A. and Stainier, D. Y.** (2015).  
715 Identification of Chemical Inhibitors of beta-Catenin-Driven Liver Tumorigenesis in  
716 Zebrafish. *PLoS Genet* **11**, e1005305.
- 717 **Fearon, K. C., Glass, D. J. and Guttridge, D. C.** (2012). Cancer cachexia:  
718 mediators, signaling, and metabolic pathways. *Cell Metab* **16**, 153-66.
- 719 **Feng, Y., Renshaw, S. and Martin, P.** (2012). Live imaging of tumor initiation in  
720 zebrafish larvae reveals a trophic role for leukocyte-derived PGE(2). *Curr Biol* **22**, 1253-9.
- 721 **Feng, Y., Santoriello, C., Mione, M., Hurlstone, A. and Martin, P.** (2010). Live  
722 imaging of innate immune cell sensing of transformed cells in zebrafish larvae: parallels  
723 between tumor initiation and wound inflammation. *PLoS Biol* **8**, e1000562.
- 724 **Figuroa-Clarevega, A. and Bilder, D.** (2015). Malignant Drosophila tumors  
725 interrupt insulin signaling to induce cachexia-like wasting. *Dev Cell* **33**, 47-55.
- 726 **Garelli, A., Gontijo, A. M., Miguela, V., Caparros, E. and Dominguez, M.**  
727 (2012). Imaginal discs secrete insulin-like peptide 8 to mediate plasticity of growth and  
728 maturation. *Science* **336**, 579-82.
- 729 **Garelli, A., Heredia, F., Casimiro, A. P., Macedo, A., Nunes, C., Garcez, M.,**  
730 **Dias, A. R., Volonte, Y. A., Uhlmann, T., Caparros, E. et al.** (2015). Dilp8 requires the  
731 neuronal relaxin receptor Lgr3 to couple growth to developmental timing. *Nat Commun* **6**,  
732 8732.
- 733 **Grosse, J., Heffron, H., Burling, K., Akhter Hossain, M., Habib, A. M., Rogers,**  
734 **G. J., Richards, P., Larder, R., Rimmington, D., Adriaenssens, A. A. et al.** (2014). Insulin-  
735 like peptide 5 is an orexigenic gastrointestinal hormone. *Proc Natl Acad Sci U S A* **111**,  
736 11133-8.
- 737 **Hanahan, D. and Weinberg, R. A.** (2011). Hallmarks of cancer: the next  
738 generation. *Cell* **144**, 646-74.

- 739 **Her, G. M., Chiang, C. C., Chen, W. Y. and Wu, J. L.** (2003). In vivo studies of  
740 liver-type fatty acid binding protein (L-FABP) gene expression in liver of transgenic zebrafish  
741 (Danio rerio). *FEBS Lett* **538**, 125-33.
- 742 **Hojo, H., Enya, S., Arai, M., Suzuki, Y., Nojiri, T., Kangawa, K., Koyama, S.**  
743 **and Kawaoka, S.** (2017). Remote reprogramming of hepatic circadian transcriptome by  
744 breast cancer. *Oncotarget*.
- 745 **Katsuyama, T., Comoglio, F., Seimiya, M., Cabuy, E. and Paro, R.** (2015).  
746 During Drosophila disc regeneration, JAK/STAT coordinates cell proliferation with Dilp8-  
747 mediated developmental delay. *Proc Natl Acad Sci U S A* **112**, E2327-36.
- 748 **Kaufman, C. K., Mosimann, C., Fan, Z. P., Yang, S., Thomas, A. J., Ablain, J.,**  
749 **Tan, J. L., Fogley, R. D., van Rooijen, E., Hagedorn, E. J. et al.** (2016). A zebrafish  
750 melanoma model reveals emergence of neural crest identity during melanoma initiation.  
751 *Science* **351**, aad2197.
- 752 **Kawakami, K.** (2004). Transgenesis and gene trap methods in zebrafish by using  
753 the Tol2 transposable element. *Methods Cell Biol* **77**, 201-22.
- 754 **Kawakami, K., Asakawa, K., Hibi, M., Itoh, M., Muto, A. and Wada, H.**  
755 (2016). Gal4 Driver Transgenic Zebrafish: Powerful Tools to Study Developmental Biology,  
756 Organogenesis, and Neuroscience. *Adv Genet* **95**, 65-87.
- 757 **Kawakami, K., Koga, A., Hori, H. and Shima, A.** (1998). Excision of the tol2  
758 transposable element of the medaka fish, *Oryzias latipes*, in zebrafish, *Danio rerio*. *Gene* **225**,  
759 17-22.
- 760 **Kawaoka, S., Hara, K., Shoji, K., Kobayashi, M., Shimada, T., Sugano, S.,**  
761 **Tomari, Y., Suzuki, Y. and Katsuma, S.** (2013). The comprehensive epigenome map of  
762 piRNA clusters. *Nucleic Acids Res* **41**, 1581-90.
- 763 **Kim, J. H., Lee, S. R., Li, L. H., Park, H. J., Park, J. H., Lee, K. Y., Kim, M.**  
764 **K., Shin, B. A. and Choi, S. Y.** (2011). High cleavage efficiency of a 2A peptide derived  
765 from porcine teschovirus-1 in human cell lines, zebrafish and mice. *PLoS One* **6**, e18556.
- 766 **Kim, S. H., Scott, S. A., Bennett, M. J., Carson, R. P., Fessel, J., Brown, H. A.**  
767 **and Ess, K. C.** (2013). Multi-organ abnormalities and mTORC1 activation in zebrafish model  
768 of multiple acyl-CoA dehydrogenase deficiency. *PLoS Genet* **9**, e1003563.
- 769 **Kir, S., Komaba, H., Garcia, A. P., Economopoulos, K. P., Liu, W., Lanske, B.,**  
770 **Hodin, R. A. and Spiegelman, B. M.** (2016). PTH/PTHrP Receptor Mediates Cachexia in  
771 Models of Kidney Failure and Cancer. *Cell Metab* **23**, 315-23.
- 772 **Kir, S., White, J. P., Kleiner, S., Kazak, L., Cohen, P., Baracos, V. E. and**  
773 **Spiegelman, B. M.** (2014). Tumour-derived PTH-related protein triggers adipose tissue  
774 browning and cancer cachexia. *Nature* **513**, 100-4.
- 775 **Kitaguchi, T., Kawakami, K. and Kawahara, A.** (2009). Transcriptional  
776 regulation of a myeloid-lineage specific gene lysozyme C during zebrafish myelopoiesis.  
777 *Mech Dev* **126**, 314-23.
- 778 **Krzywinski, M. and Altman, N.** (2014). Points of significance: Comparing  
779 samples-part I. *Nat Methods* **11**, 215-6.
- 780 **Kuipers, F., Bloks, V. W. and Groen, A. K.** (2014). Beyond intestinal soap--bile  
781 acids in metabolic control. *Nat Rev Endocrinol* **10**, 488-98.
- 782 **Kwon, Y., Song, W., Droujinine, I. A., Hu, Y., Asara, J. M. and Perrimon, N.**  
783 (2015). Systemic organ wasting induced by localized expression of the secreted insulin/IGF  
784 antagonist ImpL2. *Dev Cell* **33**, 36-46.
- 785 **Lieffers, J. R., Mourtzakis, M., Hall, K. D., McCargar, L. J., Prado, C. M. and**  
786 **Baracos, V. E.** (2009). A visceraally driven cachexia syndrome in patients with advanced  
787 colorectal cancer: contributions of organ and tumor mass to whole-body energy demands. *Am*  
788 *J Clin Nutr* **89**, 1173-9.
- 789 **Lister, J. A., Capper, A., Zeng, Z., Mathers, M. E., Richardson, J.,**  
790 **Paranthaman, K., Jackson, I. J. and Patton, E. E.** (2014). A conditional zebrafish MITF  
791 mutation reveals MITF levels are critical for melanoma promotion vs. regression in vivo. *J*  
792 *Invest Dermatol* **134**, 133-40.
- 793 **Liu, H., Pathak, P., Boehme, S. and Chiang, J. Y.** (2016). Cholesterol 7alpha-

- 794 hydroxylase protects the liver from inflammation and fibrosis by maintaining cholesterol  
795 homeostasis. *J Lipid Res* **57**, 1831-1844.
- 796 **Lober, V. H., Mouradov, D. and Heath, J. K.** (2016). Focusing the Spotlight on  
797 the Zebrafish Intestine to Illuminate Mechanisms of Colorectal Cancer. *Adv Exp Med Biol*  
798 **916**, 411-37.
- 799 **Mayrhofer, M., Gourain, V., Reischl, M., Affaticati, P., Jenett, A., Joly, J. S.,**  
800 **Benelli, M., Demichelis, F., Poliani, P. L., Sieger, D. et al.** (2017). A novel brain tumour  
801 model in zebrafish reveals the role of YAP activation in MAPK- and PI3K-induced malignant  
802 growth. *Dis Model Mech* **10**, 15-28.
- 803 **McAllister, S. S. and Weinberg, R. A.** (2014). The tumour-induced systemic  
804 environment as a critical regulator of cancer progression and metastasis. *Nat Cell Biol* **16**,  
805 717-27.
- 806 **Mione, M. and Zon, L. I.** (2012). Cancer and inflammation: an aspirin a day  
807 keeps the cancer at bay. *Curr Biol* **22**, R522-5.
- 808 **Narsale, A. A., Enos, R. T., Puppa, M. J., Chatterjee, S., Murphy, E. A., Fayad,**  
809 **R., Pena, M. O., Durstine, J. L. and Carson, J. A.** (2015). Liver inflammation and  
810 metabolic signaling in ApcMin/+ mice: the role of cachexia progression. *PLoS One* **10**,  
811 e0119888.
- 812 **Okin, D. and Medzhitov, R.** (2016). The Effect of Sustained Inflammation on  
813 Hepatic Mevalonate Pathway Results in Hyperglycemia. *Cell* **165**, 343-56.
- 814 **Omae, M., Takada, N., Yamamoto, S., Nakajima, H. and Sato, T. N.** (2013).  
815 Identification of inter-organ vascular network: vessels bridging between organs. *PLoS One* **8**,  
816 e65720.
- 817 **Owusu-Ansah, E. and Perrimon, N.** (2015). Stress signaling between organs in  
818 metazoa. *Annu Rev Cell Dev Biol* **31**, 497-522.
- 819 **Patton, E. E.** (2012). Live imaging in zebrafish reveals neu(trophil) insight into  
820 the metastatic niche. *J Pathol* **227**, 381-4.
- 821 **Robison, L. L. and Hudson, M. M.** (2014). Survivors of childhood and  
822 adolescent cancer: life-long risks and responsibilities. *Nat Rev Cancer* **14**, 61-70.
- 823 **Rose, S. R., Horne, V. E., Howell, J., Lawson, S. A., Rutter, M. M., Trotman, G.**  
824 **E. and Corathers, S. D.** (2016). Late endocrine effects of childhood cancer. *Nat Rev*  
825 *Endocrinol* **12**, 319-36.
- 826 **Santoriello, C., Gennaro, E., Anelli, V., Distel, M., Kelly, A., Koster, R. W.,**  
827 **Hurlstone, A. and Mione, M.** (2010). Kita driven expression of oncogenic HRAS leads to  
828 early onset and highly penetrant melanoma in zebrafish. *PLoS One* **5**, e15170.
- 829 **Schneider, C. A., Rasband, W. S. and Eliceiri, K. W.** (2012). NIH Image to  
830 ImageJ: 25 years of image analysis. *Nat Methods* **9**, 671-5.
- 831 **Schubert, S., Shannon, K. and Bollag, G.** (2007). Hyperactive Ras in  
832 developmental disorders and cancer. *Nat Rev Cancer* **7**, 295-308.
- 833 **Suzuki, A., Makinoshima, H., Wakaguri, H., Esumi, H., Sugano, S., Kohno, T.,**  
834 **Tsuchihara, K. and Suzuki, Y.** (2014). Aberrant transcriptional regulations in cancers:  
835 genome, transcriptome and epigenome analysis of lung adenocarcinoma cell lines. *Nucleic*  
836 *Acids Res* **42**, 13557-72.
- 837 **Takada, N., Kucenas, S. and Appel, B.** (2010). Sox10 is necessary for  
838 oligodendrocyte survival following axon wrapping. *Glia* **58**, 996-1006.
- 839 **Thermes, V., Grabher, C., Ristoratore, F., Bourrat, F., Choulika, A., Wittbrodt,**  
840 **J. and Joly, J. S.** (2002). I-SceI meganuclease mediates highly efficient transgenesis in fish.  
841 *Mech Dev* **118**, 91-8.
- 842 **Thomas, C., Pellicciari, R., Pruzanski, M., Auwerx, J. and Schoonjans, K.**  
843 (2008). Targeting bile-acid signalling for metabolic diseases. *Nat Rev Drug Discov* **7**, 678-93.
- 844 **Vallejo, D. M., Juarez-Carreño, S., Bolívar, J., Morante, J. and Dominguez, M.**  
845 (2015). A brain circuit that synchronizes growth and maturation revealed through Dilp8  
846 binding to Lgr3. *Science* **350**, aac6767.
- 847 **Wallace, K. N., Akhter, S., Smith, E. M., Lorent, K. and Pack, M.** (2005).  
848 Intestinal growth and differentiation in zebrafish. *Mech Dev* **122**, 157-73.

849           **Wang, Z., Du, J., Lam, S. H., Mathavan, S., Matsudaira, P. and Gong, Z.**  
850 (2010). Morphological and molecular evidence for functional organization along the  
851 rostrocaudal axis of the adult zebrafish intestine. *BMC Genomics* **11**, 392.  
852           **White, R., Rose, K. and Zon, L.** (2013). Zebrafish cancer: the state of the art and  
853 the path forward. *Nat Rev Cancer* **13**, 624-36.  
854           **White, R. M., Cech, J., Ratanasirintraooot, S., Lin, C. Y., Rahl, P. B., Burke,**  
855 **C. J., Langdon, E., Tomlinson, M. L., Mosher, J., Kaufman, C. et al.** (2011). DHODH  
856 modulates transcriptional elongation in the neural crest and melanoma. *Nature* **471**, 518-22.  
857           **White, R. M., Sessa, A., Burke, C., Bowman, T., LeBlanc, J., Ceol, C.,**  
858 **Bourque, C., Dovey, M., Goessling, W., Burns, C. E. et al.** (2008). Transparent adult  
859 zebrafish as a tool for in vivo transplantation analysis. *Cell Stem Cell* **2**, 183-9.  
860

861



862 **Figure legends**

863 **Figure 1 Screening a combination of *Gal4* lines and  $5\times UAS:EGFP-kras^{G12D}$  transgene**  
864 **that causes outgrowth of target organs**

865 (A) The structure of  $5\times UAS:EGFP-P2A-kras^{G12D}$ . The gray triangles represent the sequence  
866 recognized by Tol2 transposases.

867 (B)-(Q) Screening for a *Gal4* line that is potent to induce outgrowth of target organs. Images  
868 of the sibling control (left) and  $EGFP-kras^{G12D}$ -expressing fish (right) are shown. Higher-  
869 magnification images are also presented. (B), (D), (F), (H), (J), (L), (N), and (P) are bright  
870 filed images while the others are fluorescence images (EGFP). Target organs are outlined by  
871 white dots ((B)-(E) for gSAIzGFFD1105A (*pInt-Gal4*) (7 dpf), (F)-(I) for gSAIzGFFM103B  
872 (*aInt-Gal4*) (7 dpf), (J)-(M) for gSAIzGFFD886A (*Liver-Gal4*) (7 dpf), and (N)-(Q) for  
873 gSAGFF138A (*Brain-Gal4*) (3 dpf)). Fish without EGFP expression from the same clutch  
874 were used as sibling controls. White arrows indicate organs that express the  $EGFP-kras^{G12D}$   
875 transgene. Scale bar indicates 1 mm.

876

877 **Figure 2 *pInt-Gal4* driven  $kras^{G12D}$  expression leads to abnormal proliferation of**  
878 **intestinal cells**

879 (A)-(B) Representative images of tumor-bearing fish ( $Tg(pInt-Gal4)^{+/Tg}; Tg(5\times UAS:EGFP-$   
880  $P2A-kras^{G12D})^{+/Tg}$ ) and the sibling control ( $Tg(pInt-Gal4)^{+/Tg}; Tg(UAS:EGFP)^{+/Tg}$ ) at 5 dpf.  
881 Bright field (A) and EGFP (B) images are shown. Scale bar indicates 500  $\mu\text{m}$ .

882 (C) qPCR for  $EGFP-P2A-kras^{G12D}$  expression in the sibling controls and tumor-bearing fish.  
883 The scores are normalized to expression of *rpl13a*. The data harbors three biological  
884 replicates. Error bars represent  $\pm$  s.e.m.

885 (D)-(I) Representative images of DAPI staining in intestine sections of tumor-bearing fish and  
886 the sibling controls at 5 dpf. DAPI (D, E) and EGFP (F, G) images are shown. In the merged  
887 images (H, I), DAPI and EGFP signals are shown in blue and green, respectively. Scale bar  
888 indicates 100  $\mu\text{m}$ .

889 (J) The number of EGFP and DAPI positive intestinal cells. The number of nuclei was  
890 manually counted from single section per individual fish. The data harbors 7 and 11 biological  
891 replicates from tumor-bearing fish and the sibling controls, respectively. Error bars represent  
892  $\pm$  s.e.m. Statistical significance was tested using student's *t*-test (unpaired, one-tailed).

893 (K)-(R) Representative images of fluorescent immunohistochemistry for phosphorylated  
894 histone H3 (pH3) in intestine sections of tumor-bearing fish and the sibling controls at 5 dpf.  
895 pH3 (K, L), DAPI (M, N) and EGFP (O, P) images are shown. White arrows indicate  
896 intestinal cells positive for pH3, EGFP, and DAPI. In the merged images (Q, R), pH3, DAPI  
897 and EGFP signals are shown in red, blue and green, respectively. Scale bar indicates 100  $\mu$ m.

898 (S) The number of intestinal cells positive for pH3, EGFP, and DAPI. The number of pH3,  
899 EGFP, and DAPI positive cells was counted from single section per individual fish. The data  
900 harbors 8 and 6 biological replicates from tumor-bearing fish and the sibling controls,  
901 respectively. Error bars represent  $\pm$  s.e.m.

902

903 **Figure 3 *pInt-Gal4* driven *kras*<sup>G12D</sup> expression results in dysplasia originating from**  
904 **intestinal epithelial cells**

905 (A)-(H) Representative images of fluorescent immunohistochemistry for *cdh1* in intestine  
906 sections of the sibling controls and tumor-bearing fish at 5 dpf. *cdh1* (A, B), EGFP (C, D) and  
907 DAPI (E, F) images are shown. In the merged images (G, H), *cdh1*, EGFP and DAPI signals  
908 are shown in red, green and blue, respectively. Scale bar indicates 100  $\mu$ m.

909 (I)-(L) Representative images of HE-stained intestine sections of the sibling controls (I, K)  
910 and tumor-bearing fish (J, L) at 5 dpf. Transversal and sagittal sections are shown in (I, J) and  
911 (K, L), respectively. Scale bar represents 50  $\mu$ m.

912 (M)-(O) qPCR analysis for *mmp* genes in the intestine at 9 dpf. The scores are normalized to  
913 expression of *rpl13a*. The data harbors 5 biological replicates, each containing the intestines  
914 from 5 fish. Error bars represent  $\pm$  s.e.m. Statistical significance was tested using student's *t*-  
915 test (unpaired, one-tailed).

916

917 **Figure 4 The zebrafish intestinal tumor instigates local and distant inflammation**

918 (A)-(H) Representative images of the sibling controls and tumor-bearing fish carrying  
919 *Tg(lyz:EGFP)* transgene at 7 and 9 dpf. Bright field (A, B, E, F) and EGFP (C, D, G, H)  
920 images are shown. Scale bar indicates 1 mm.

921 (I)-(N) Representative images of whole mount fluorescent immunohistochemistry for lyz in  
922 the intestines of the sibling controls and tumor-bearing fish at 7 dpf. Lyz (I, J) and  
923 Hoechst33342 (K, L) images are shown. The intestine is shown by yellow-dotted lines in (I, J).  
924 In the merged images (M, N), Lyz and Hoechst33324 signals are shown in green and blue,  
925 respectively. White arrows indicate representative neutrophils in the intestine. Scale bar  
926 indicates 100  $\mu$ m.

927 (O) The number of neutrophils in the intestines of the sibling controls and tumor-bearing fish.  
928 The data harbors 6 biological replicates. Error bars represent  $\pm$  s.e.m. Statistical significance  
929 was tested using student's *t*-test (unpaired, one-tailed).

930 (P-Q) Representative images of the livers of the sibling controls and tumor-bearing fish  
931 carrying *Tg(lyz:EGFP)* and *Tg(fabp10a:mCherry)* at 7 dpf. Neutrophils and the liver are  
932 shown by green and magenta, respectively. White arrows indicate representative neutrophils  
933 in the liver. Scale bar indicates 100  $\mu$ m.

934 (R) The number of neutrophils in the livers of the sibling controls and tumor-bearing fish at 7  
935 dpf. The data harbors 12 biological replicates. Error bars represent  $\pm$  s.e.m. Statistical  
936 significance was tested using student's *t*-test (unpaired, one-tailed).

937 (S) Liver size of the sibling controls and tumor-bearing fish at 7 dpf. Liver size was measured  
938 from *Tg(fabp10a:mCherry)* images using ImageJ software. The data harbors 12 biological  
939 replicates. Error bars represent  $\pm$  s.e.m. Statistical significance was tested using student's *t*-test  
940 (unpaired, one-tailed).

941

942 **Figure 5 The zebrafish intestinal tumor causes the systemic growth defect and**

943 **organismal death**

944 (A) Body length data of the sibling controls and tumor-bearing fish at 7 and 9 dpf. The  
945 number of fish used is 163 (7 dpf control fish), 155 (7 dpf tumor-bearing fish), 154 (9 dpf  
946 control fish) and 154 (9 dpf tumor-bearing fish). Data from three independent clutches are  
947 pooled. Data from each clutch are shown in Fig. S4. Error bars represent  $\pm$  s.e.m. Statistical  
948 significance was tested using student's *t*-test (unpaired, two-tailed).

949 (B)-(E) Representative images of Oil Red O staining for the sibling controls (B, C) and  
950 tumor-bearing fish (D, E) at 9 dpf. Scale bar represents 500  $\mu$ m. Red-stained areas represent  
951 endogenous lipids in fish.

952 (F)-(G) Representative images of HE-stained body sections for the sibling controls (G) and  
953 tumor-bearing fish (H) at 9 dpf. Scale bar represents 50  $\mu$ m.

954 (H) qPCR analysis for *eif4ebp1* in the body (without the intestine or intestinal tumor) in the  
955 sibling controls and tumor-bearing fish at 9 dpf. Scores are normalized to expression of  
956 *rpl13a*. The data harbors 5 biological replicates, each containing 5 fish. Error bars represent  $\pm$   
957 s.e.m. Statistical significance was tested using student's *t*-test (unpaired, two-tailed).

958 (J) Survival analysis of the sibling controls and tumor-bearing fish. Twenty fish per a tank  
959 were fed from 7 dpf, and the number of dead fish was counted everyday. Data were obtained  
960 by five independent experiments. Error bars represent  $\pm$  s.e.m.

961

962 **Figure 6 Whole-organismal level gene expression analysis identifies tumor-liver**  
963 **crosstalk characterized by the decreased expression of hepatic *cyp7a1* and the reduced**  
964 **amount of total bile acids**

965 (A) Schematic representation of zebrafish dissection in our RNA-seq experiments followed  
966 by qPCR validation and genetics.

967 (B) Expression of *cyp7a1* in the liver. The scores are normalized to expression of *rpl13a*. The  
968 data harbors 3 biological replicates, each containing 7 fish for 5 dpf and 5 fish for 7 dpf,  
969 respectively. Error bars represent  $\pm$  s.e.m. Statistical significance was tested using student's *t*-

970 test (unpaired, one-tailed).

971 (C) Measurement for systemic bile acids levels at 7 and 9 dpf. The number of fish used is 19  
972 (7 dpf control fish), 19 (7 dpf tumor-bearing fish), 22 (9 dpf control fish) and 18 (9 dpf tumor-  
973 bearing fish). Statistical significance was tested using student's *t*-test (unpaired, one-tailed).

974 (D) Expression of a set of secreted protein-coding genes in the intestinal tumor and normal  
975 intestine. The scores are normalized to expression of *rpl13a* and to the sibling controls (=1).  
976 The data harbors 3 biological replicates, each containing 5-7 fish. Error bars represent  $\pm$  s.e.m.  
977

978 **Figure 7 Overexpression of *cyp7a1* in the liver restores the amount of total bile acids in**  
979 **tumor-bearing fish**

980 (A) The structure of *fabp10a:mCherry-P2A-cyp7a1*. The white triangles represent the  
981 recognition sequence by I-SceI meganucleases.

982 (B)-(C) Representative images of the *mCherry-cyp7a1* transgene expression in the liver.  
983 Control refers to *Tg(pInt-Gal4)<sup>+Tg</sup>*; *Tg(UAS:EGFP)<sup>+Tg</sup>*; *Tg(fabp10a:mCherry-P2A-*  
984 *cyp7a1)<sup>+Tg</sup>* while tumor-bearing fish to *Tg(pInt-Gal4)<sup>+Tg</sup>*; *Tg(5xUAS:EGFP-P2A-*  
985 *kras<sup>G12D</sup>)<sup>+Tg</sup>*; *Tg(fabp10a:mCherry-P2A-cyp7a1)<sup>+Tg</sup>*. Scale bar represents 500  $\mu$ m. Bright  
986 field (B) and mCherry (C) images are shown.

987 (D) qPCR analysis for detecting *mCherry-cyp7a1* mRNAs in the liver and the rest part of the  
988 body at 7 dpf. The scores are normalized to expression of *rpl13a*. The data harbors 3  
989 biological replicates, each containing 3 fish. Error bars represent  $\pm$  s.e.m. CypOE - and +  
990 indicate the absence and presence of *Tg(fabp10a:mCherry-P2A-cyp7a1)*, respectively.

991 (E)-(F) Measurement for systemic bile acids levels at 7 (n = 10 per a group) and 9 dpf (n =  
992 30-31 per a group). Statistical significance was tested using student's *t*-test (unpaired, one-  
993 tailed). CypOE - and + indicate the absence and presence of *Tg(fabp10a:mCherry-P2A-*  
994 *cyp7a1)*, respectively.

995

996 **Figure 8 Overexpression of *cyp7a1* in the liver ameliorates tumor-induced liver**

997 **inflammation**

998 (A) Body length data of the sibling controls and tumor-bearing fish at 9 dpf in the  
999 *Tg(fabp10a:mCherry-P2A-cyp7a1)* background. The number of fish used is 79 (control fish),  
1000 73 (control fish with *Tg(fabp10a:mCherry-P2A-cyp7a1)*), 81 (tumor-bearing fish) and 74  
1001 (tumor-bearing fish with *Tg(fabp10a:mCherry-P2A-cyp7a1)*). Error bars represent  $\pm$  s.e.m.  
1002 Statistical significance was tested using student's *t*-test (unpaired, two-tailed). CypOE - and +  
1003 indicate the absence and presence of *Tg(fabp10a:mCherry-P2A-cyp7a1)*, respectively.

1004 (B)-(C) Representative images of the livers of the sibling controls and tumor-bearing fish  
1005 carrying *Tg(lyz:EGFP)* and *Tg(fabp10a:mCherry-P2A-cyp7a1)* at 7 dpf. Neutrophils and the  
1006 liver are shown by green and magenta, respectively. Scale bar indicates 100  $\mu$ m.

1007 (D) Liver size and (E) the number of neutrophils of the sibling controls and tumor-bearing  
1008 fish carrying *Tg(lyz:EGFP)* and *Tg(fabp10a:mCherry-P2A-cyp7a1)* at 7 dpf. Liver size was  
1009 measured from *Tg(fabp10a:mCherry-P2A-cyp7a1)* images using ImageJ software. The data  
1010 harbors 18 biological replicates. Error bars represent  $\pm$  s.e.m. Statistical significance was  
1011 tested using student's *t*-test (unpaired, one-tailed).

1012

1013 **Figure 9 The graphical summary of this study.**

1014 *kras<sup>G12D</sup>* expression driven by *pInt-Gal4* results in dysplasia in the posterior intestine. Despite  
1015 histologically benign and restricted to the intestine, the intestinal tumor causes a set of  
1016 systemic adverse effects on host. The intestinal tumor recruits neutrophils to the liver,  
1017 accompanied with hepatomegaly. Tumor-bearing fish grow less than the sibling controls do,  
1018 and die around at 14 dpf. The intestinal tumor communicates with the liver, altering  
1019 cholesterol-BAs flux. This interaction is important for tumor-induced liver inflammation, but  
1020 not for other phenotypes.

1021

1022 **Supplementary Figure Legends**

1023 **Figure S1 *aInt-Gal4* is expressed in the epidermis at 2 dpf**

1024 Bright field (A, B) and EGFP (C, D) images of the sibling controls and *EGFP-kras<sup>G12D</sup>*-  
1025 expressing fish driven by gSAIzGFFM103B (*aInt-Gal4*) at 2 dpf. White arrows indicate  
1026 *EGFP-kras<sup>G12D</sup>*-expressing cells. Scale bar represents 500  $\mu$ m.

1027

1028 **Figure S2 Characterization of the pInt-Gal4-driven tumor model**

1029 (A) A gel image of genotyping of tumor-bearing fish. Band sizes detecting *Tg(5xUAS-EGFP-*  
1030 *P2A-kras<sup>G12D</sup>)*, *Tg(pInt-Gal4)* and *tp53* are 701 bp, 345 bp and 88 bp, respectively. *tp53* locus  
1031 is used as a PCR control. M, DNA ladder marker: W, wild type fish: G, parental *Tg(pInt-*  
1032 *Gal4)* line: K, parental *Tg(5xUAS-EGFP-P2A-kras<sup>G12D</sup>)* line.

1033 (B)-(I) Representative images of fluorescent immunohistochemistry for BrdU and EGFP in  
1034 intestine sections of the sibling controls and tumor bearing fish at 5 dpf. BrdU (B, C),  
1035 Hoechst33342 (D, E) and EGFP (F, G) images are shown. In the merged images (H, I), BrdU,  
1036 Hoechst33342 and EGFP signals are shown in red, blue and green, respectively. White arrows  
1037 indicate intestinal cells positive for BrdU, Hoechst33342, and EGFP. Scale bar indicates 100  
1038  $\mu$ m.

1039 (J) The number of BrdU and EGFP positive intestinal cells. The number of BrdU and EGFP  
1040 positive cells was counted from single section per individual fish. The data harbors 10 and 9  
1041 biological replicates from the sibling controls and tumor-bearing fish, respectively. Error bars  
1042 represent  $\pm$  s.e.m.

1043

1044 **Figure S3 The intestinal rumen is not completely disrupted in tumor-bearing fish**

1045 Representative images of the sibling controls (A) and tumor-bearing fish (B) at 9 dpf in the  
1046 presence of foods in the intestine are shown. Scale bar represents 500  $\mu$ m.

1047

1048 **Figure S4 The intestinal tumor causes systemic growth defects in multiple independent**

1049 **clutches**

1050 Body length data from three individual clutches at 7 dpf (A) and 9 dpf (B) are presented.

1051 Error bars represent  $\pm$  s.e.m. The numbers within the bars indicate the number of biological

1052 replicates in each clutch.

1053

1054 **Figure S5 The effects of the intestinal tumor on whole-organismal gene expression and**

1055 **cholesterol-BAs metabolism**

1056 (A) Measurement for systemic cholesterol levels at 7 and 9 dpf (n = 12 for 7 dpf and 16-19

1057 for 9 dpf). Statistical significance was tested using student's *t*-test (unpaired, one-tailed).

1058 (B)-(C) Gene expression levels of *ggt1* (B) and *mpx* (C) in the intestine at 9 dpf are shown.

1059 The scores are normalized by expression of *rpl13a*. The data harbors 5 biological replicates,

1060 each containing 5 fish. Error bars represent  $\pm$  s.e.m. Statistical significance was tested using

1061 student's *t*-test (unpaired, one-tailed).

1062

1063 **Figure S6 Correlation between body length and total BAs levels**

1064 Correlation between body length and total bile acids levels at 9 dpf (n = 20 per a group).

1065

1066 **Table S1 The primers and DNA sequences used in the study**

1067

1068 **Table S2 Raw RPKM scores determined by RNA-seq analysis**

1069

1070 **Table S3 Calculation for sample enrichments**

1071

1072 **Table S4 The list of 8261 liver enriched genes (Liver to body > 0.8, Control-liver > 0)**

1073

1074 **Table S5 The list of 7294 body-enriched genes (Body to liver > 0.8, Body to intestine >**

1075 **0.8m Control-body > 0)**



1076

1077 **Table S6 The list of 8002 intestine-enriched genes (Intestine to body > 0.8, Control-**

1078 **intestine > 0)**

1079

**A** bioRxiv preprint doi: <https://doi.org/10.1101/199349>; this version posted October 6, 2017. The copyright holder for this preprint (which was not certified by peer review) is the author/funder. All rights reserved. No reuse allowed without permission.

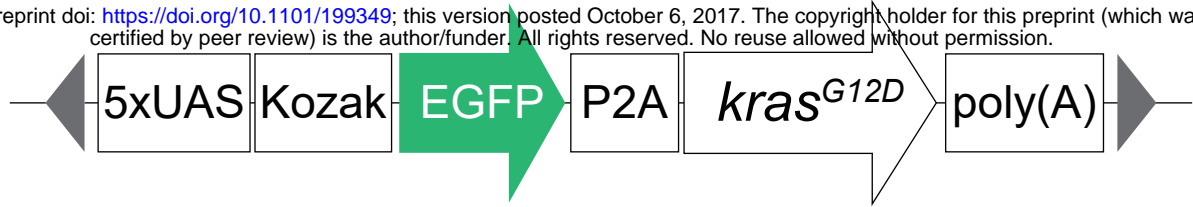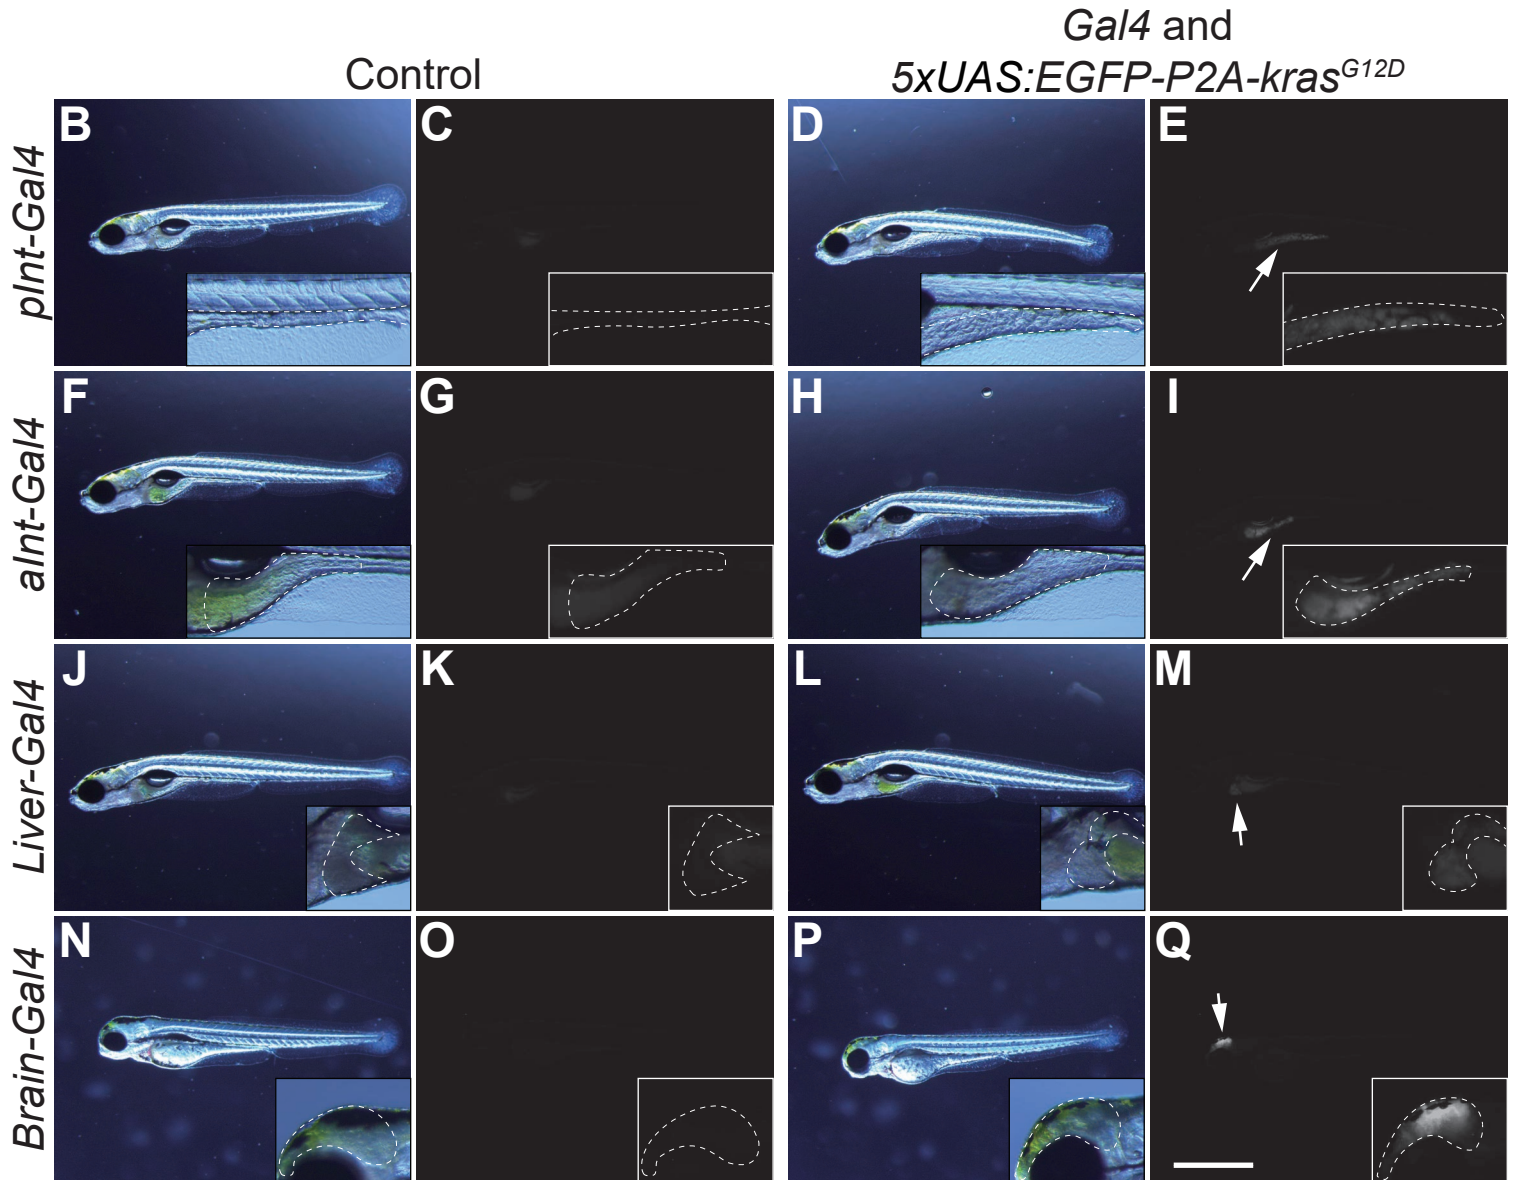

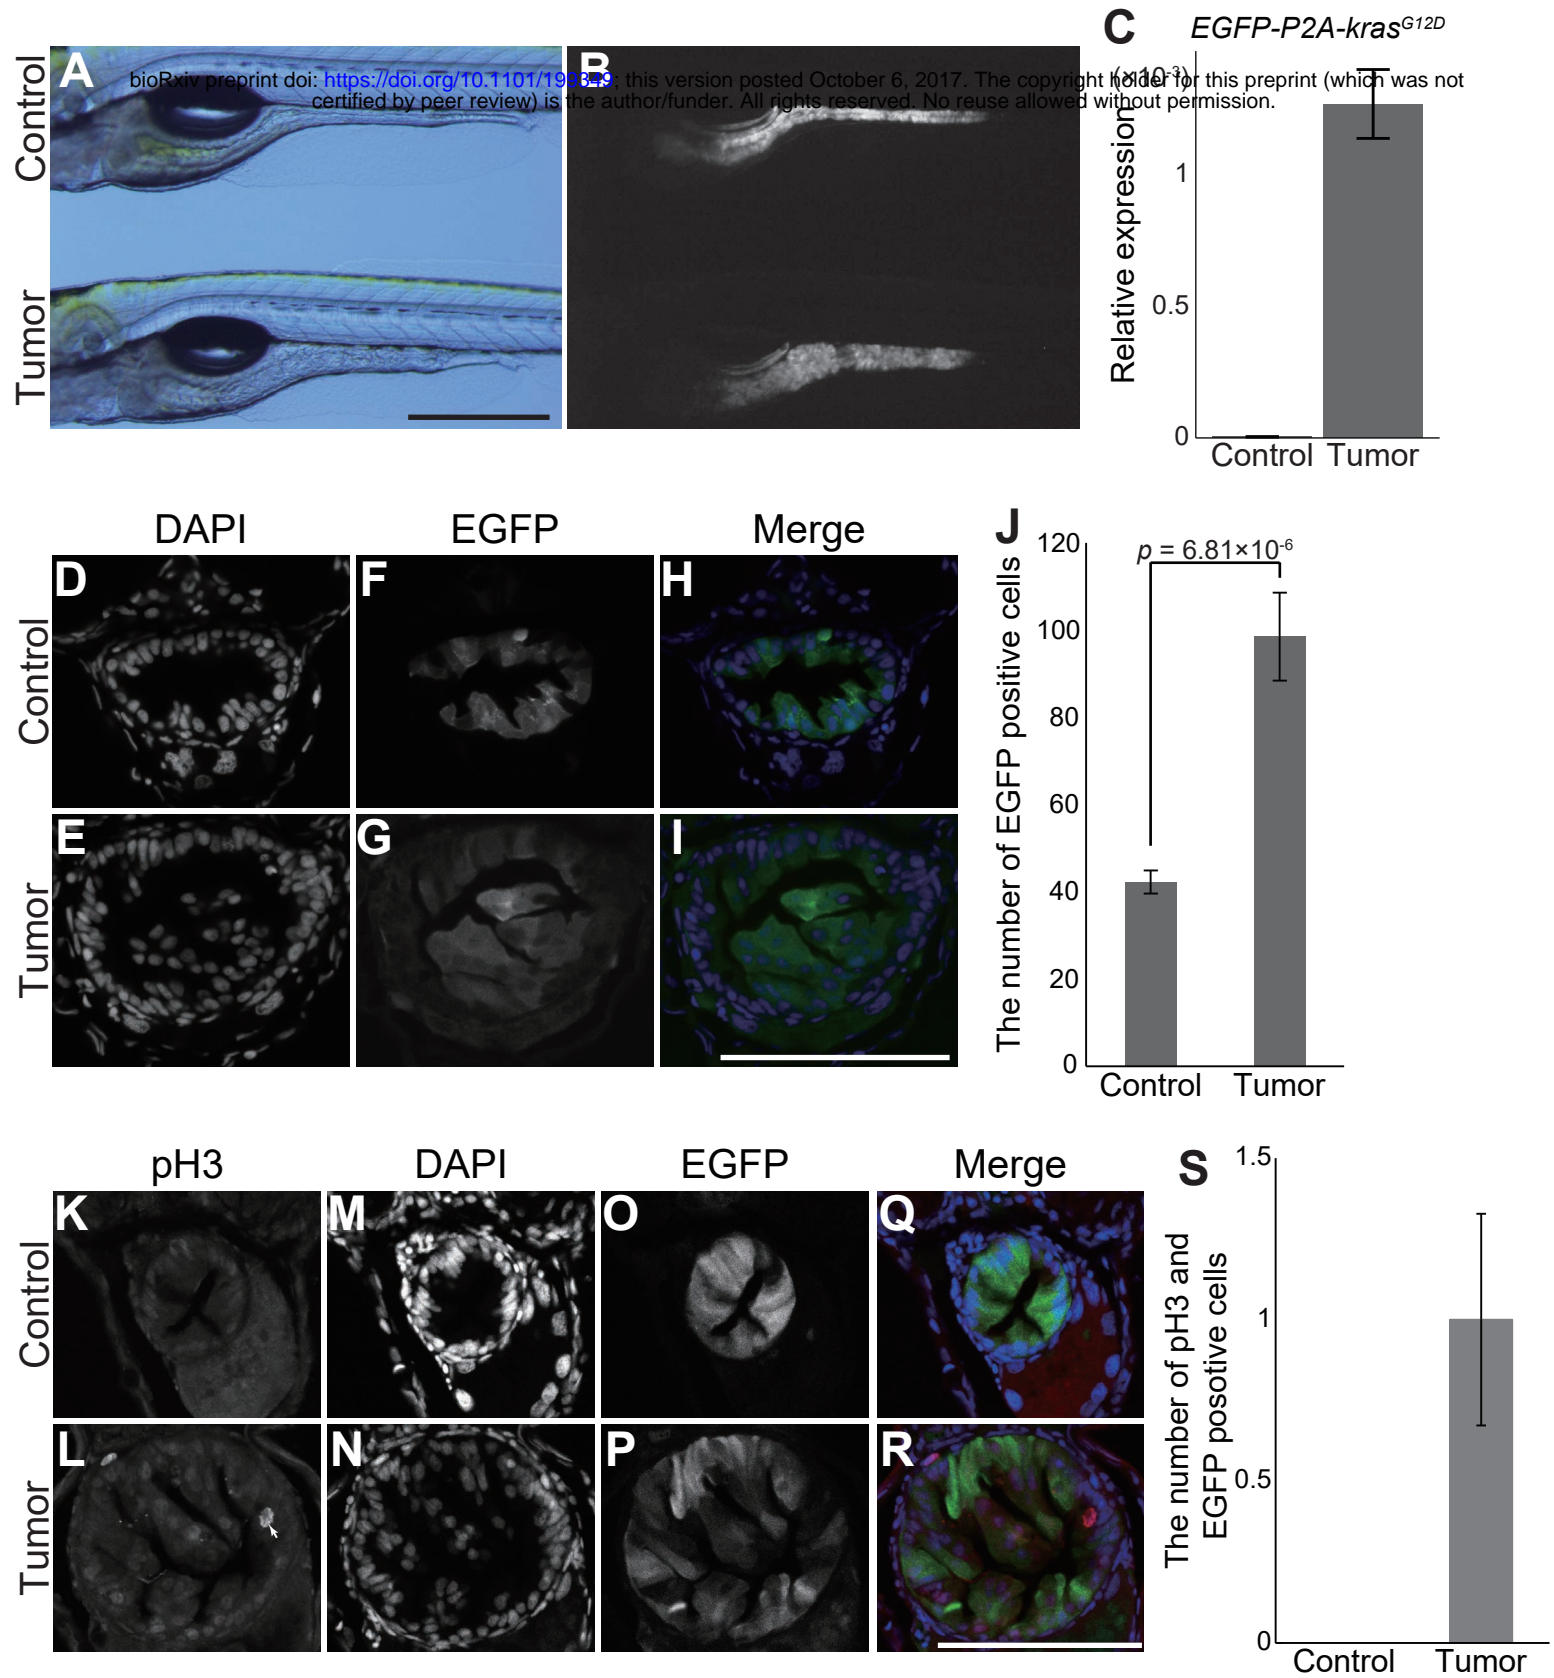

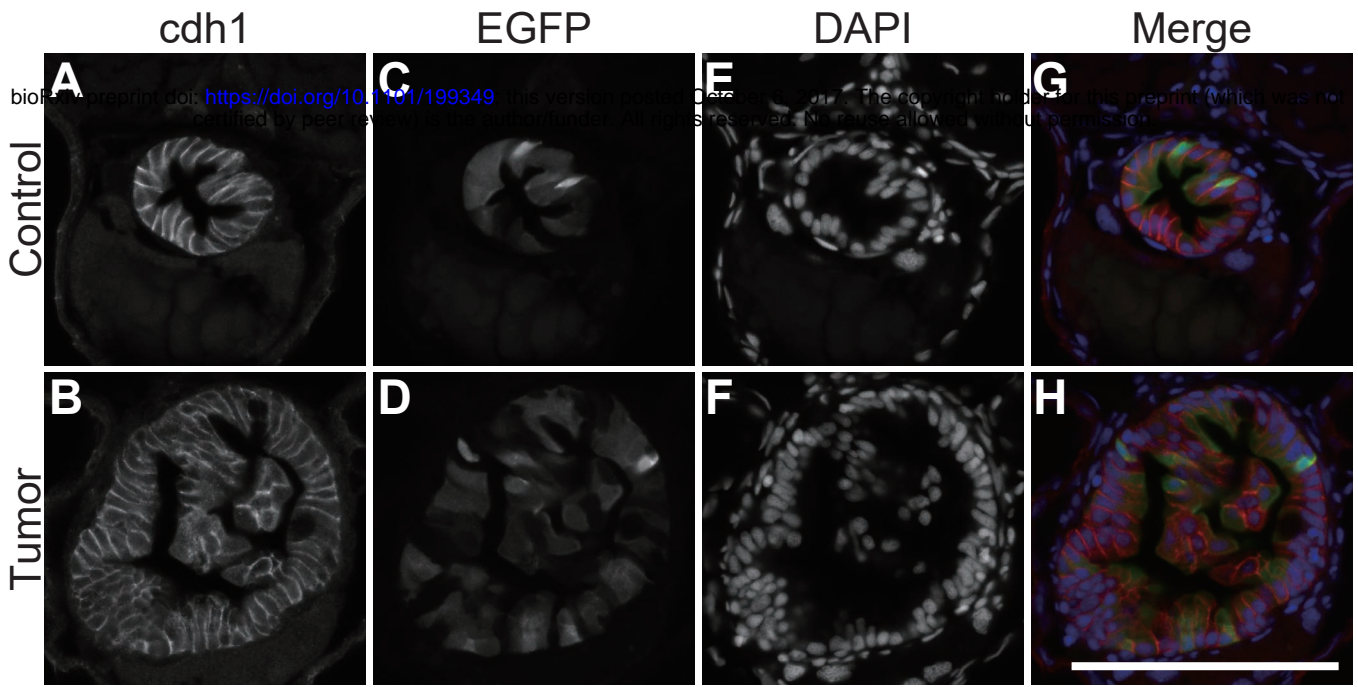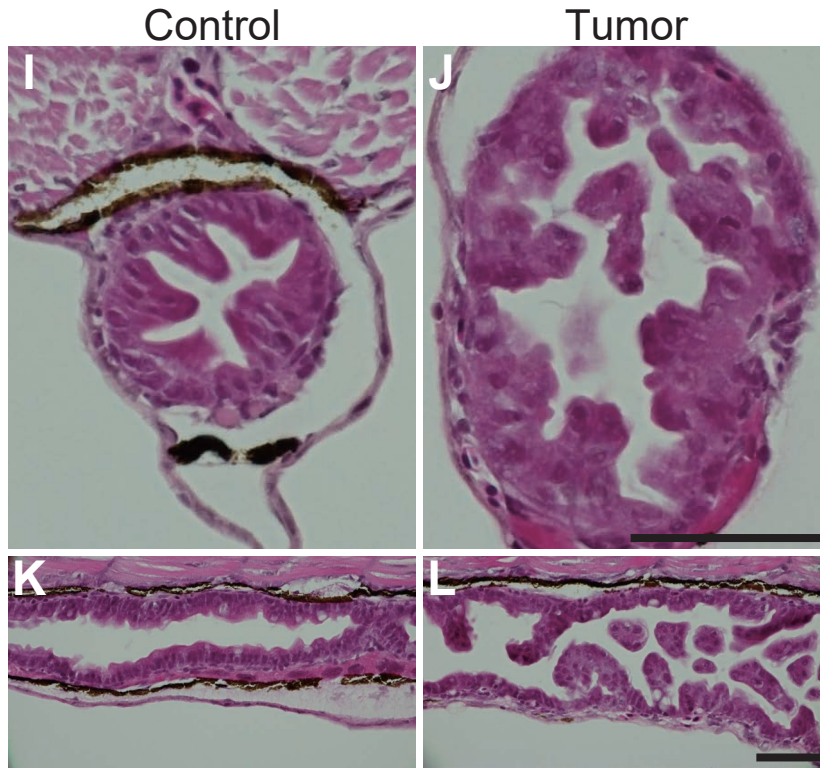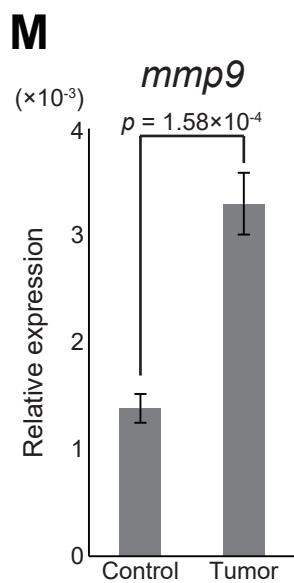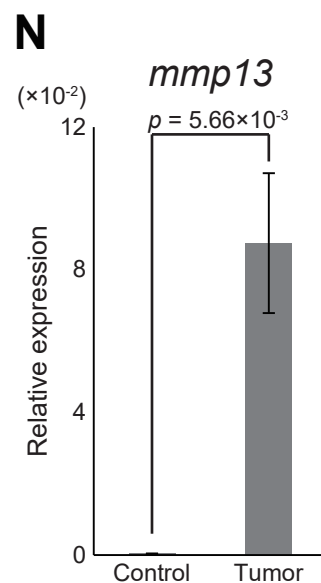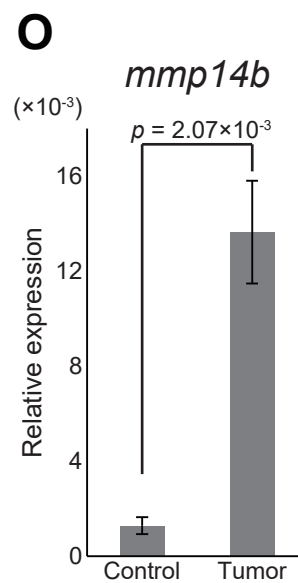

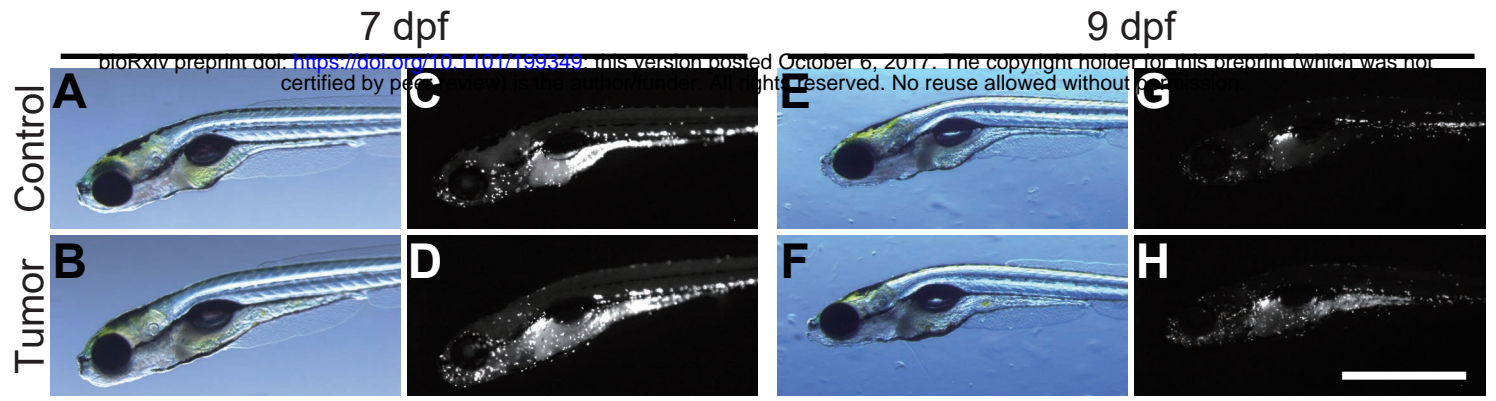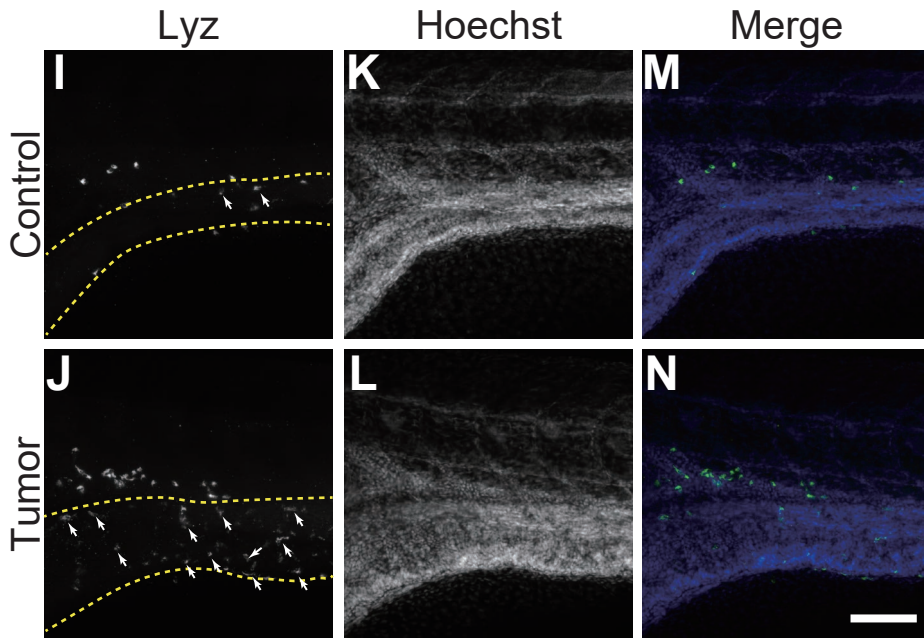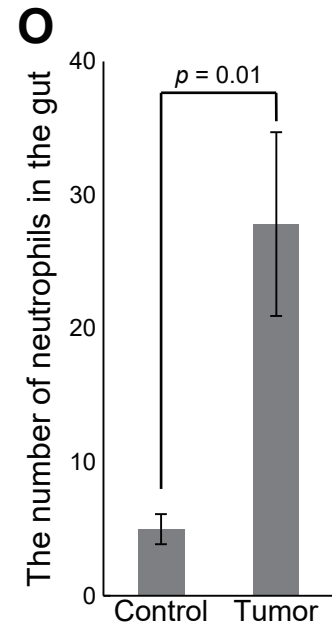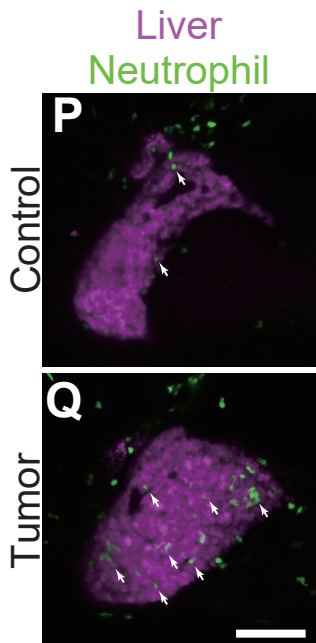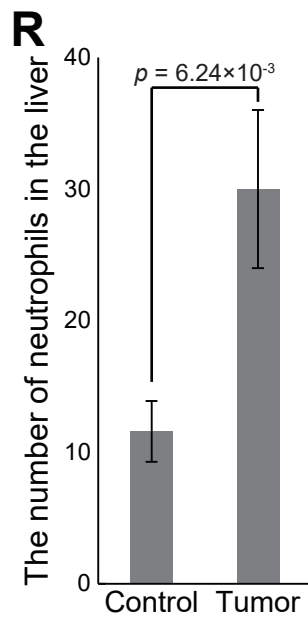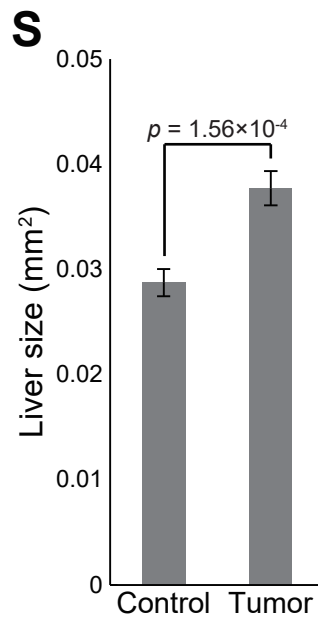

# Enya et al. Fig. 5

**A**

bioRxiv preprint doi: <https://doi.org/10.1101/199349>; this version posted October 6, 2017. The copyright holder for this preprint (which was not certified by peer review) is the author/funder. All rights reserved. No reuse allowed without permission.

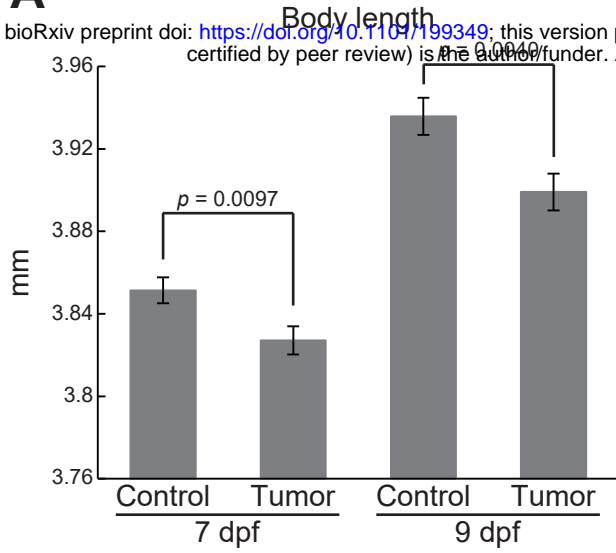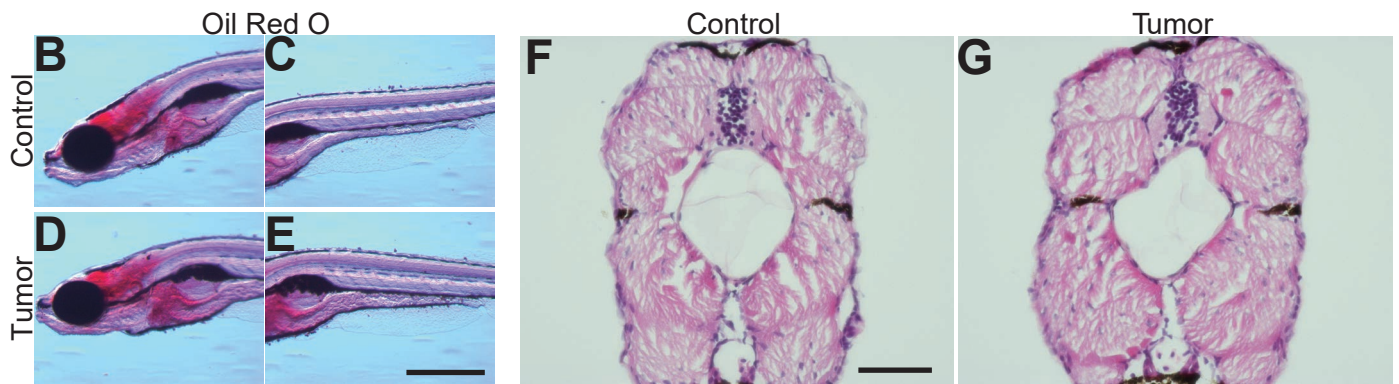

**H**

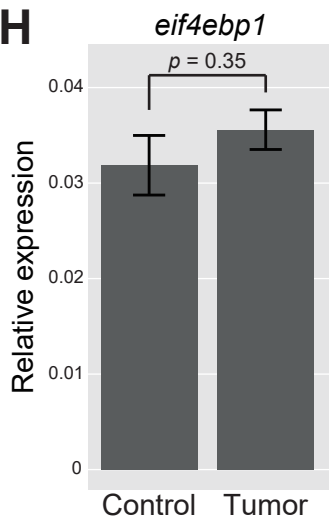

**I**

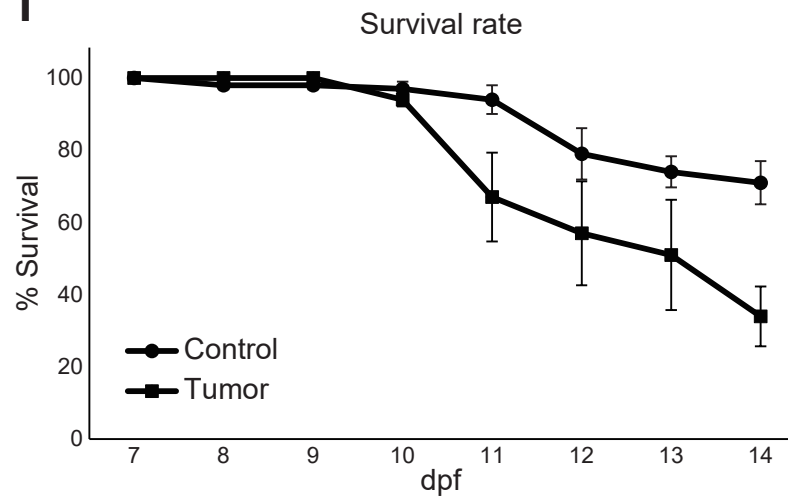

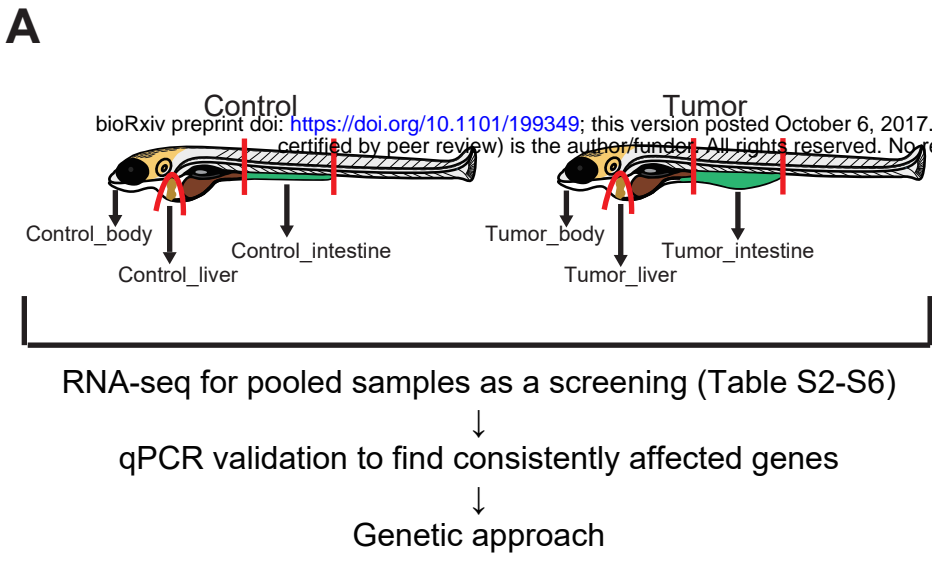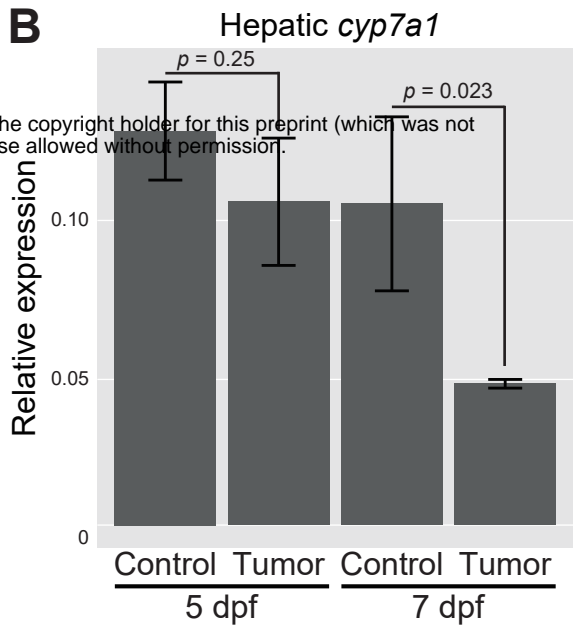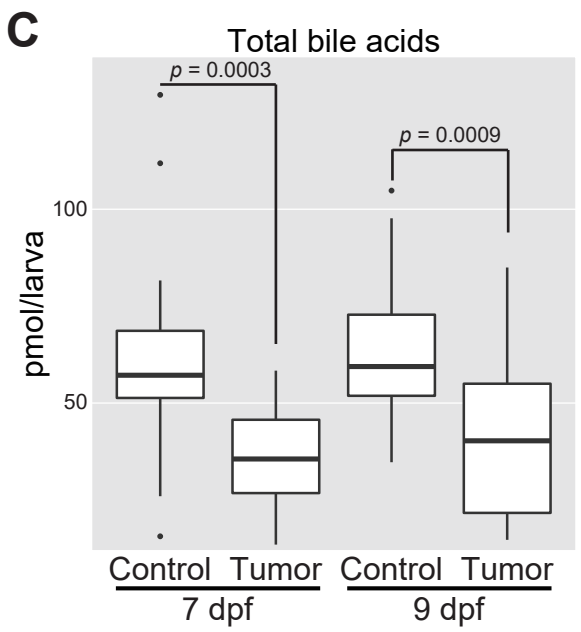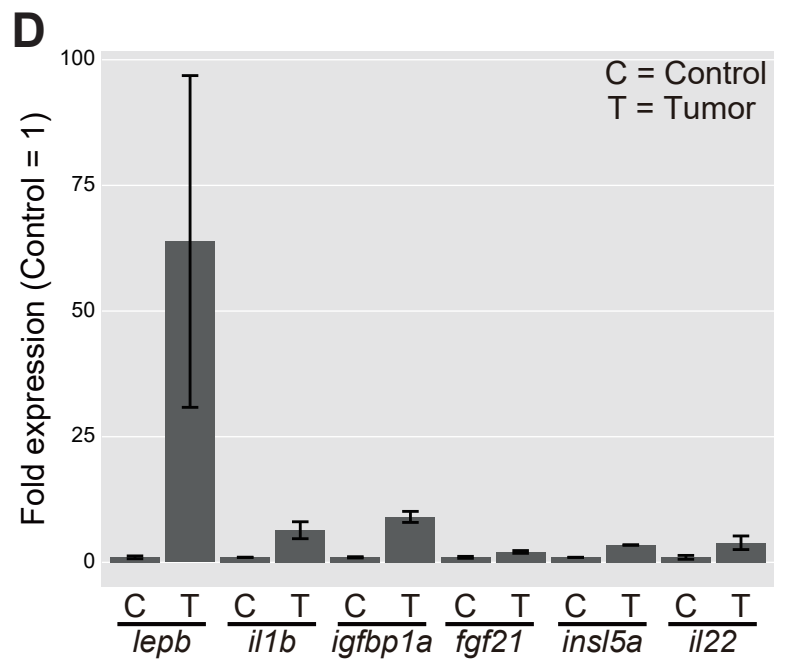

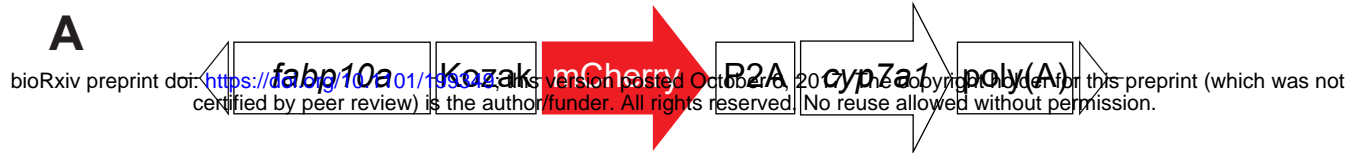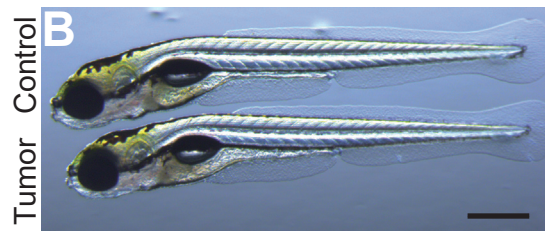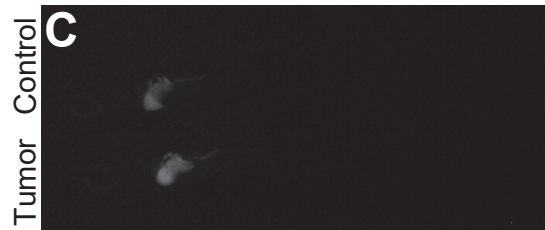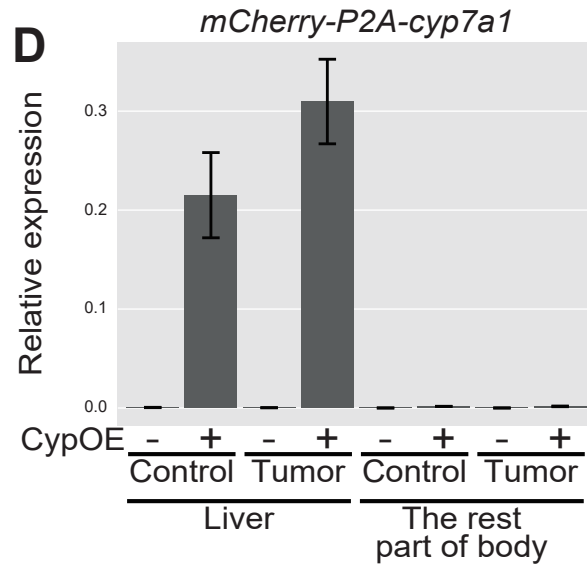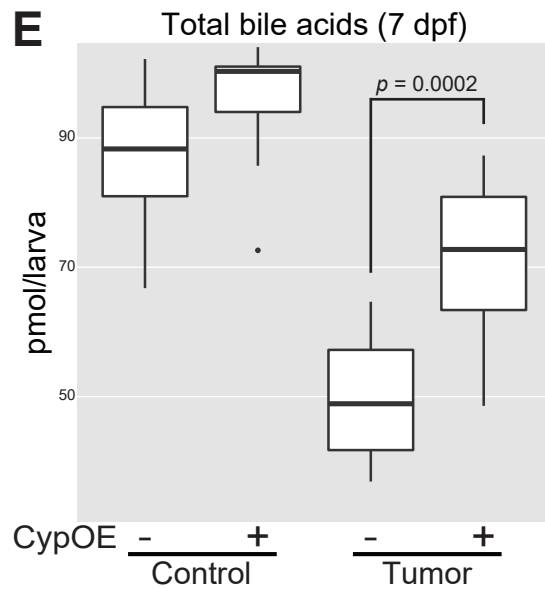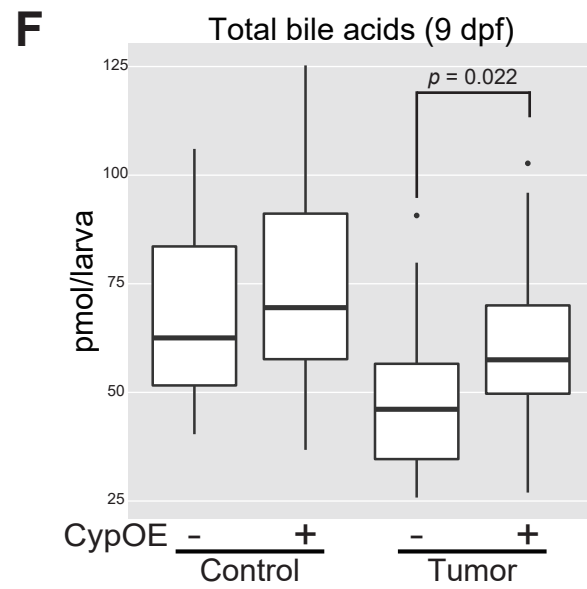



**A** bioRxiv preprint doi: <https://doi.org/10.1101/193461>; this version posted October 6, 2017. The copyright holder for this preprint (which was not certified by peer review) is the author/funder. All rights reserved. No reuse allowed without permission.

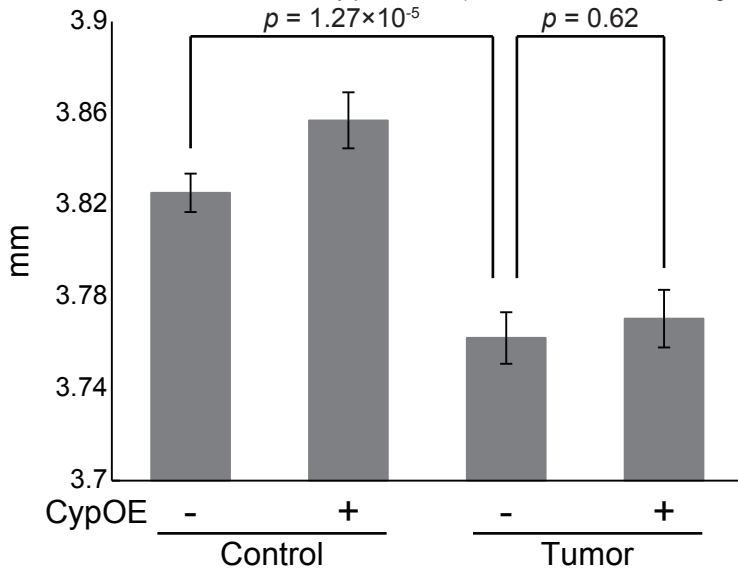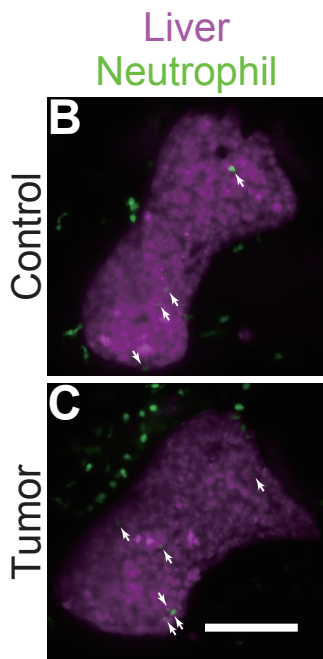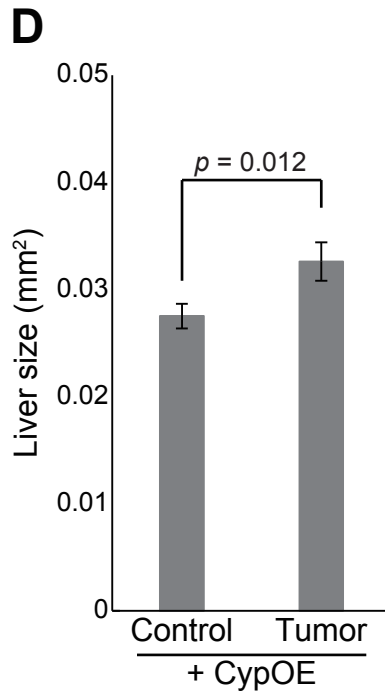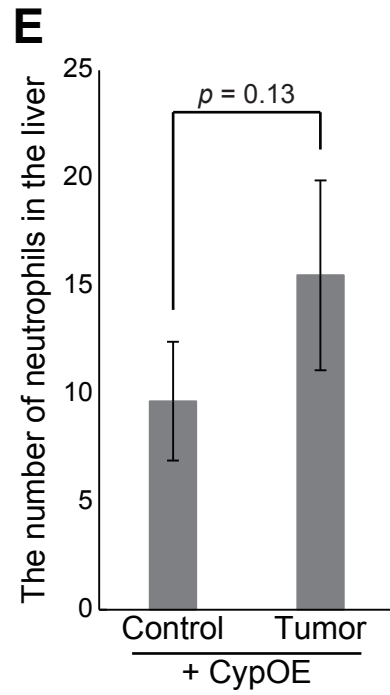

*Tg(plnt-Gal4):Tg(5xUAS:EGFP-P2A-kras<sup>G12D</sup>)* intestinal tumor model

bioRxiv preprint doi: <https://doi.org/10.1101/199349>; this version posted October 2, 2017. The copyright holder for this preprint (which was not certified by peer review) is the author/funder. All rights reserved. No reuse allowed without permission.

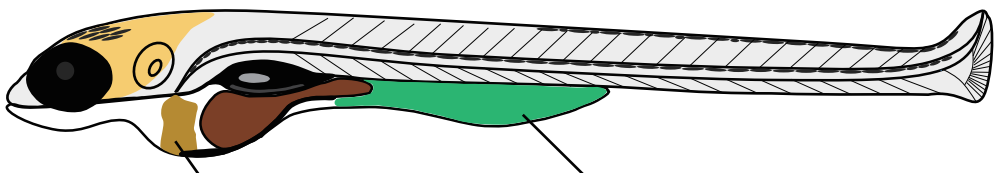

Liver

- Inflammation
- Hepatomegaly
- Expression of *cyp7a1* ↓
- Bile acids production ↓

Intestinal tumor driven by *kras<sup>G12D</sup>*

- Proliferation ↑
- Dysplasia
- Expression of *mmp* genes ↑
- Inflammation
- Expression of secreted protein-coding genes ↑

Systemic level

- Inflammation
- Growth defect
- Mortality ↑

The intestinal tumor → *cyp7a1* ↓ → Bile acids production ↓ → Liver inflammation ↑  
(altered cholesterol-BAs flux)

Tumor's adverse effect on the liver
